1 **Title: Local adaptation of life-history traits within urban populations of *Arabidopsis thaliana***

2 **Authors: Gregor Schmitz<sup>1</sup>, Anja Linstädter<sup>2</sup>, Anke S. K. Frank<sup>1,2</sup>, Hannes Dittberner<sup>1</sup>, Andrea**  
3 **Schrader<sup>1,4</sup>, Karl-Heinz Linne von Berg<sup>1</sup>, George Coupland<sup>5</sup>, Juliette de Meaux<sup>1,\*</sup>**

4 <sup>1</sup> Institute for Plant Sciences, Biocenter, Zülpicher Str. 47b, 50674 Cologne, Germany,

5 <sup>2</sup> Institute of Biochemistry and Biology, University of Potsdam, Maulbeerallee 1, 14469 Potsdam,  
6 Germany,

7 <sup>3</sup> School of Life and Environmental Sciences, The University of Sydney, Sydney, Australia

8 <sup>4</sup> RWTH Aachen University, Institute for Biology I, Molecular Botany, Worringer Weg 3, 52062  
9 Aachen, Germany

10 <sup>5</sup> Max Planck Institute of Plant Breeding Research, Cologne, Germany

11 \*Corresponding author.

12 **Abstract (max 350)**

- 13 1. The challenges to which plants are exposed in urban environments represent, in miniature,  
14 the challenges plants face as a result of global environmental change. Hence, urban habitats  
15 provide a unique opportunity to assess whether processes of local adaptation are taking  
16 place despite the short temporal and geographical scales that characterize the anthropocene  
17 .
- 18 2. We quantified the ecological diversity of spontaneously occurring urban habitat patches of *A.*  
19 *thaliana*. Using plant community indicators, we show that these patches differ in their levels  
20 of soil nutrient content and disturbance. Accordingly, plants in each patch displayed  
21 significantly different flowering time, size, and fitness.
- 22 3. Using a deep sampling approach coupled with reduced genome-sequencing, we demonstrate  
23 that most individuals can be assigned to a limited set of clonal lineages; the genetic diversity  
24 of these lineages represents the diversity observed in western European populations of the  
25 species, indicating that established urban populations originate from a broad regional pool of  
26 lineages.
- 27 4. We assessed the genetic and phenotypic diversity of these lineages in a set of common  
28 garden experiments. We report marked genetic differences in life-history traits, including  
29 time of primary and secondary dormancy as well as of flowering. These genetic differences in  
30 life-history traits are not randomly distributed but sorted out by ecological differences  
31 among sites of origin.
- 32 5. **Synthesis:** Our study shows that the genetically diverse phenology of a regional *A. thaliana*  
33 gene pool is not randomly distributed but filtered by urban environmental heterogeneity.

34 This report is the first to show a pattern of local genetic adaptation within urban  
35 environments. We conclude that environmental filtering helps maintain functional diversity  
36 within species.

37

38 **Keywords: urban ecology, local adaptation, environmental filtering, life-history trait**  
39 **adaptation, ruderal species**

40

## 41 **1. Introduction**

42 Predicting how plant and animal populations will cope with the challenges imposed by global  
43 environmental change remains a pressing goal in ecology. Urban environments provide untapped  
44 opportunities to link ecological and phenotypic diversity over the short temporal and spatial scales  
45 that define the anthropocene (Johnson & Munshi-South, 2017; Szulkin et al., 2020). Understanding  
46 how plant functional variation is optimized within local urban environments can provide crucial  
47 information on species' potential to cope with upcoming global changes.

48 Compared to that in neighboring more rural areas, the climate in urban environments is generally  
49 characterized by increased temperature and reduced moisture, and thus a higher drought likelihood  
50 (Lambrecht et al. 2016). In addition, small-scale differences within urban microclimate are  
51 observable, depending on urban geometry and construction materials (Chatzidimitriou & Yannas,  
52 2015). Urban microhabitats differ in edaphic characteristics: soils vary considerably in their  
53 developmental stage, depth, compaction, and surface transformation (Foti, 2017; Johnson & Munshi-  
54 South, 2017; Tresch et al., 2018). Shallow, sealed soils with a low capacity for water storage and low  
55 nutrient content typify the so-called urban gray spaces associated with built urban elements, such as  
56 sidewalks. They occur in close vicinity to nutrient-rich urban green spaces, often with eutrophic or  
57 even contaminated soils, which results in huge variation in soil-mediated plant resources over small  
58 spatial scales (Bonthoux et al., 2019; Gilbert, 2012; Vega & Küffer, 2021). Cities also host numerous  
59 ruderal sites, which are exposed to frequent and often severe disturbances, fragmentation, and high  
60 turnover rates among populations (Dubois & Cheptou, 2017; Guo et al., 2018). In addition, human-  
61 driven disturbances, such as weeding or mowing, may shorten the time windows for growth and  
62 reproduction, and thus modulate further the disturbance patterns.

63 Major life-history decisions, such as the timing of germination and the timing of flowering, are critical  
64 for resource acquisition and reproductive success, because of their impact on plant phenology. They  
65 therefore contribute to the persistence of populations in heterogeneous urban settings (Liu et al.,  
66 2021; Nord & Lynch, 2009). Plant phenology can be optimized locally by the environment because  
67 the life-history traits underlying it are modulated both by nutrient resources and by environmental  
68 cues, such as temperature and photoperiod (Vidal et al., 2014). For example, flowering time is  
69 accelerated by winter temperature and resource stress and by high temperatures in spring, and  
70 delayed by the shortening days of the fall (Andrés & Coupland, 2012; Li et al., 2019). Plant phenology  
71 thus shifts in response to environmental cues that are modified by climate change (Chmielewski &  
72 Rötzer, 2001; Piao et al., 2019; Primack & Miller-Rushing, 2012). The genetic composition of the  
73 population can also be tuned by local selective pressures acting on phenology. Adaptation to local  
74 environments has been observed experimentally in many organisms (Kawecki & Ebert 2004; Leimu &

75 Fischer 2008). Clearly, adaptation via new genetic mutations is unlikely within urban settings  
76 because urban populations are small, fragmented, and prone to frequent extinction (Orr, 2005).  
77 However, if the pool of migrant genotypes is sufficiently diverse, and if each local environment  
78 selects its fittest genotype from these pools, then individual genotypes may be locally adapted.  
79 Indeed, patterns of local adaptation detected over small distances suggest that this kind of  
80 environmental filtering could happen in urban habitats (Halbritter et al., 2018; Lenssen et al., 2004;  
81 Robioneck-Selosse et al., 2021). In recent years, several studies have described phenotypic differences  
82 and genetic differentiation between individuals from urban and neighboring rural sites, consistently  
83 indicating that populations adapt rapidly to urban environments. These studies documented direct  
84 selection for novel optima in life-history traits, such as a late flowering time and decreased dispersal  
85 in holy hawksbeard (*Crepis sancta*); an early flowering time in common ragweed (*Ambrosia*  
86 *artemisiifolia*); and decreased cyanogenesis in white clover (*Trifolium repens*) (Cheptou et al., 2008;  
87 Gorton et al., 2018; Lambrecht et al., 2016; Santangelo et al., 2022; Thompson et al., 2016).  
88 Altogether, however, the amount of genetic variation in life-history traits, the distribution of this  
89 variation across diverse urban sites, and its contribution to local adaptation remain unknown  
90 (Johnson & Munshi-South, 2017).

91 Urban environments in regions with temperate climates often host populations of short-lived  
92 herbaceous species, including the Brassicaceae species *Arabidopsis thaliana* (Bomblies et al., 2010;  
93 Herben et al., 2016; Huang et al., 2018). This species -- the initial model of plant molecular biology --  
94 has become a powerful system for answering fundamental questions of ecology, evolution, and  
95 global environmental change (Exposito-Alonso et al., 2018; Fournier-Level et al., 2011; Takou et al.,  
96 2019). *A. thaliana*, which is native to large areas of Eurasia and Africa, has recently colonized many  
97 other parts of the world (Durvasula et al., 2017; Svardal et al., 2017). The deep sampling of natural  
98 populations across various regions of its area of distribution has shown how environmental  
99 heterogeneity shapes the distribution of genetic diversity in *A. thaliana* (Castilla et al., 2020; DeLeo et  
100 al., 2020; Dubin et al., 2015, p. 20; Luo et al., 2015). Life-history trait adaptation appears to happen in  
101 concert across regional environments (reviewed in Takou et al. 2019). This includes adaptation in the  
102 timing of distinct phenological stages such as germination (Kronholm et al., 2012), or the onset of  
103 flowering (Ågren et al., 2017; Akiyama & Ågren, 2018; Le Corre, 2005), but also the tuning of other  
104 life-history traits such as the rate of rosette growth (Debieu et al., 2013; Wieters et al., 2021).

105 In the present study, we determined the relative importance of environmental plasticity and genetic  
106 variation in shaping the phenology and fitness of eight spontaneously occurring urban populations of  
107 *A. thaliana*. We asked i) Are *A. thaliana* urban populations occupying ecologically diverse habitats? ii)  
108 Are *A. thaliana* populations genetically diverse? iii) Is this genetic diversity randomly distributed  
109 across habitats? By combining plant-community and trait-based ecological measurements with

110 analyses of genetic diversity at genomic and phenological levels, we show that genotypes growing in  
111 urban habitats exposed to high resource limitations and increased disturbance levels tend to have  
112 traits tailored to local conditions.

## 113 **2. Materials and Methods**

### 114 *Study area*

115 Our study focused on urban *A. thaliana* populations in the city of Cologne, situated in midwestern  
116 Germany (about 50.9°N, 7.0°E). Cologne is Germany's fourth most populous city, with more than one  
117 million inhabitants (Ansmann et al., 2021). One of Germany's warmest cities, it has a temperate  
118 oceanic climate with a mean annual temperature of 11.7 °C during the day and 6.3 °C at night, and a  
119 mean annual precipitation of 840 mm.

### 120 *Field surveys, phenology monitoring, and functional trait measurements*

121 We surveyed eight *A. thaliana* populations within a 4.3 x 3.7 km area in southwestern Cologne. Study  
122 populations were selected based on their accessibility and on their isolation from other populations,  
123 with all habitat patches located at least 0.6 km from one another. Urban habitat patches where  
124 viable *A. thaliana* populations were observable included green spaces such as disturbed lawns;  
125 various habitats within gray spaces, such as sidewalks, wall tops, and bases; and vegetated roadsides  
126 (Figure 1a; Table S1). Depending on habitat characteristics, patch size ranged from 4 m<sup>2</sup> for  
127 populations on wall tops to > 100 m<sup>2</sup> for populations in vegetated roadsides, and population size  
128 ranged from 15 to 1,000 individuals. All populations were studied throughout their growth period in  
129 2017 (which extended between early March and the end of June), and revisited yearly during five  
130 subsequent growth periods (2018-2022) to assess population persistence. No field permissions were  
131 necessary for the collection of the plant samples in this study.

132 We recorded phenological stages and fitness-related plant functional traits of *A. thaliana* individuals  
133 distributed over the eight habitat patches. At each patch, we established 10 to 14 observation  
134 quadrats (10 x 10 cm), each at least 50-60 cm from one another. We marked from 1 to 3 *A. thaliana*  
135 individuals per quadrat (15-24 per habitat patch; 174 in total) and visited them twice a week during  
136 the study period to score their development. For all marked individuals, we recorded the day of  
137 bolting (i.e., when the inflorescence became visible) and, subsequently, the number of open flowers  
138 and the number of closed fruits. Rosette diameter and the number of rosette leaves were measured  
139 at the time of bolting. We used these observation data to derive five phenological stages and five  
140 fitness-related plant functional traits ("fitness proxies"; see Table 1). The selection of plant functional  
141 traits follows recommendations for the assessment of plant fitness (Gibson, 2014), while  
142 phenological stages were selected to represent life-history stages of the entire growth period, as  
143 recommended for herbaceous species (Huang et al., 2018; Nordt et al., 2021). Germination was

144 generally not possible to determine *in situ*, except in populations growing on wall tops (SGY, KAD,  
145 HLU).

146 **Table 1.** Phenological stages and fitness proxies measured *in situ* for urban populations of *A.*  
147 *thaliana*; with units of measurement; minimum, maximum (Min/Max) and median trait values for the  
148 whole data collected across the study sites. doy: days of year, mm: millimeter.

| Variable set        | Stage or Trait [Unit]                 | Min/Max | Median |
|---------------------|---------------------------------------|---------|--------|
| Phenological stages | Bolting (inflorescence visible) [doy] | 69/90   | 79.0   |
|                     | Onset of flowering [doy]              | 75/131  | 89.0   |
|                     | Onset of fruiting [doy]               | 86/144  | 94     |
|                     | Flowering duration [days]             | 1/78    | 18     |
|                     | Fruiting duration [days]              | 1/75    | 26     |
| Fitness proxies     | Rosette diameter at bolting [mm]      | 4/45    | 15     |
|                     | Rosette leaf no. at bolting           | 3/24    | 10     |
|                     | Generative height [mm]                | 9/330   | 83     |
|                     | Max. number of open flowers           | 1/35    | 3      |
|                     | Max. number of closed fruits          | 1/190   | 18     |

149

#### 150 *Assessment of environmental conditions of habitat patches*

151 Abiotic environmental conditions and characteristics of disturbance regime were recorded at the  
152 level of habitat patches, making use of the indicator function of plant communities (Kollmann &  
153 Fischer, 2003). We used species' Ellenberg indicator values, EIVs (Ellenberg & Leuschner, 2010), as a  
154 proxy for abiotic conditions. EIVs, which express the optimal positions of Central European plant  
155 species along gradients of abiotic factors, provide information about species' niche and habitat  
156 requirements (Diekmann 2003), in both rural and urban habitats (Fanelli et al. 2006). EIVs are  
157 expressed on an ordinal scale ranging from 1 to 9 and refer to light regime (L), temperature (T), and  
158 continentality of climate (K). Edaphic conditions are captured as soil moisture (F), pH (R), and  
159 nutrient availability (N). Likewise, species' disturbance indicator values (DIVs) (Herben et al., 2016),  
160 were used to characterize the disturbance regimes of urban habitat patches. To this end, we  
161 extracted species-level indicators for disturbance severity (DS), disturbance frequency (DF), and  
162 disturbance effects on vegetation structure (DV). We determined the composition of plant  
163 communities in autumn (late August and early September) 2017 by recording the presence of all  
164 vascular plant species in the herbaceous layer of the habitat patches. Based on species' specific  
165 indicator values (see Table S2), average EIVs and DIVs were calculated for each habitat patch.

#### 166 *Assessment of genomic variation*

167 At the end of the 2017 growth period, we harvested seeds from 5 to 19 individuals per population  
168 and used single seeds from each individual to produce progenies. For four of the eight habitat  
169 patches (BER, BIS, KAD, and MIL), we also included seeds from individuals sampled in the year prior  
170 to field data collection, referring to these as population samples (Table S3). In order to broaden our  
171 view of the genomic diversity of *A. thaliana* in Cologne, we also produced progenies from seeds  
172 collected at 30 additional habitat patches distributed throughout the sampling area but not included  
173 in the *in situ* monitoring (so-called scattered samples). Field collected seeds were grown in a  
174 randomized setting, under conditions simulating winter, i.e., in growth chambers with 10 h light at  
175 18 °C / 14 h dark at 16 °C, 60 % humidity, for 6 weeks; followed by 8 h light/16 h dark at 4°C, 80 %  
176 humidity, for 6 weeks; and ultimately ripened in the greenhouse in spring-like conditions with 16 h  
177 light, at about 20-24 °C / 8 h dark at about 18-20 °C until harvest. Seeds for progeny were harvested  
178 using Aracons (Betatech, Gent, Belgium).

179 Three leaves per plant were sampled for DNA extraction, deep frozen, and homogenized using a  
180 Precellys Evolution homogenizer (Thermo Fisher Scientific, Waltham, MA, USA). DNA was isolated  
181 using the NucleoSpin® Plant II kit (Macherey-Nagel, Düren, Germany). Genomic DNA was prepared  
182 for RAD-Seq as described by Dittberner et al. (2019) using 10 pools with 20 plants each, and  
183 sequencing was performed at the Max Planck Institute of Plant Breeding Research. The  
184 bioinformatics pipelines used for read mapping, and identification of each of the 12 genotypes  
185 present in the studied habitat patches are described in the supplementary information.

#### 186 *Common garden experiments:*

187 For each identified genotype, two individuals were randomly selected and amplified in the  
188 greenhouse. Since they were raised in the same maternal environment, variance among genotypes  
189 can be assigned to genetic effects and variance among replicate lines of each genotype allows testing  
190 whether all maternal effects were effectively removed. We then took eight individuals from each of  
191 these two lines and grew them in growth chambers (Johnson Controls, Milwaukee, WI, USA) in three  
192 trials under different growth conditions. Growth conditions were chosen to identify genetic variation  
193 in the major pathways regulating flowering time: constant long days (16 h light at 20°C/8h dark at  
194 18°C); constant short days (8 h light at 18°C day/16 dark at 16°C night); and short  
195 days/vernalization/long days (8 h day light at 18°C /16 h dark at 16°C for 5 weeks; 8h day light/16h  
196 dark at 4 °C for 4 weeks, 16 h day light at 20°C/8h dark at 18°C until ripening). The *A. thaliana* line  
197 Col-0 was included as a reference in all experiments. Because we did not detect differences between  
198 replicated lines, we determined that we had 16 replicates/genotype for this experiment. Replicates  
199 were chosen randomly and sown in individual 6-cm-diameter pots that were watered regularly by



200 flooding the trays. Flowering time was determined as the time span between sowing and the first  
201 flower to open petals.

202 Ripe seeds from the short-day/vernalization/long-day experiment were harvested and stored at  
203 room temperature for the germination assay. Germination rates were determined after three  
204 months to quantify primary dormancy (Baskin & Baskin, 2004). Seeds were sown on wet filter paper  
205 and incubated in closed microtiter plates. Before incubation under long-day conditions (16 h light at  
206 20°C/8h dark at 18°C), seeds were incubated in the dark either at 4 °C for 7 days to demonstrate  
207 their capacity to germinate at 100%, or at -21 °C for 4 d and at 35 °C for 4 d to quantify variation in  
208 secondary dormancy. Germination was scored after 10 days.

209 To quantify genetic variation under outdoor field conditions, we conducted a set of common garden  
210 experiments. For this, seeds from 4 independent replicate lines per genotype were sown directly at a  
211 density of 8 seeds per pot. In total, we planted 32 pots per genotype and randomized 9-cm- diameter  
212 pots at a field site in the botanical garden of Cologne University. Again, because we found no  
213 significant differences between replicate lines, we determined that the experiment was complete  
214 with 32 replicates per line. Seeds were sown in late summer (August 23) and in early autumn  
215 (September 20), mid-autumn (November 8), and late winter (February 26). Rather than being  
216 watered artificially, pots were put on a fabric that retained water after rainfall. The site was  
217 protected against birds and rabbits by a net. Plants were inspected for germination twice a week.  
218 Flowering time was scored when the first flower showed open petals. For fertility measurement,  
219 siliques were counted at the end of each plant's life cycle.

220 Phenotypic data was analyzed using the glm function in R. We used one-way ANOVA with habitat  
221 patch as the fixed factor to analyze differences in environmental conditions (EIVs and DIVs of plant  
222 species co-occurring with *A. thaliana*); and in the phenological stages and fitness proxies of *A.*  
223 *thaliana* plants observed *in situ*. Measurements of flowering time in common garden experiments  
224 were analyzed with two-way ANOVA, using genotype and cohort or growth condition as fixed factors.

225 For germination assays under controlled indoor conditions, the number of germinants per Petri dish  
226 was analyzed with the R function zeroinfl to correct for zero inflation. For germination rates in the  
227 outdoor common garden experiment, we proceeded as under controlled conditions, except that we  
228 used a quasipoisson distribution of error. Because the two replicate lines we used for each genotype  
229 never showed significant effects, the line effect was not included in any of the models. We used the  
230 function ANOVA with a Chi-squared test to determine the overall significance of effects. In all cases,  
231 the significance of pairwise differences was tested with a Tukey post-hoc test, using the function glht  
232 from the multcomp package in R. We used the Pearson coefficient of the cor.test function in R to  
233 quantify the correlation between phenotypes.



234

## 235 **Results**

### 236 **Urban habitat patches of *A. thaliana* are ecologically diverse**

237 The eight urban habitat patches differed significantly in environmental conditions related to climate,  
238 soil, and severity of disturbance. Indicator values for light (L), and edaphic conditions -- humidity (F),  
239 and soil nutrients (N) -- differed between sites (Figure 1b, supplemental Figure 1a, b; humidity (F):  
240  $F_{7,113}=2.855$ ,  $p=0.00883$ ; soil nutrients (N):  $F_{7,93}=2.777$ ,  $p=0.0114$ , light (L):  $F_{7,130}=2.329$ ,  $p=0.0285$ ).  
241 Indicator values of the accompanying flora for herb-layer disturbance frequency (DF) and herb-layer  
242 structure-based disturbance (DV) differed between sites (Figure 1c, supplemental Figure 1c; DF:  
243  $F_{7,84}=2.897$ ,  $p=0.0092$ ; DV:  $F_{7,84}=3.108$ ,  $p=0.00577$ ), whereas differences in herb-layer disturbance  
244 severity (DS) were not significant. The three values for disturbance were strongly and positively  
245 correlated with each other (range of  $r$ : 0.802 – 0.958;  $p<0.00172$ ) and with the temperature indicator  
246 (range of  $r$ : 0.736 – 0.803;  $p<0.00632$ ; Figure 1d; supplemental Figure 2, supplemental Table 2) .

### 247 **Plants differ across habitat patches in their phenology and fitness**

248 Across the eight urban *A. thaliana* populations, all phenological stages and plant functional traits  
249 measured *in situ* showed significant differences ( $p<2.43e-06$ ;  $F=6.094$ , Table S4; supplemental Figure  
250 3). These are exemplified in data on flowering time and rosette size (Figure 2a,b). The diverse traits  
251 describing phenological time points, the temporal spacing between phenological states, and the size  
252 of the plants also covaried (supplemental Figure 4).

### 253 **Community-level indicators of environmental variables explain part of the phenotypic differences** 254 **between field sites**

255 *In situ* observations of phenotypic differences between sampling sites were partly correlated with  
256 the differences in environmental characteristics: as expected, plants from sites with high mean  
257 values for N- and F-indicators, which reflect differences in nutrient and soil moisture levels,  
258 respectively, were on average larger than those from sites with lower N- and F-indicator values ( $p$ -  
259 values smaller than 0.05 for F: inflorescence length, maximal number of open flowers, rosette  
260 diameter; for N: rosette diameter at bolting, number of rosette leaves, and number of fruits; Figure  
261 2c). Plants from sites with higher disturbance values bolted later than plants from other sites, but  
262 formed larger inflorescences bearing more fruits.

### 263 **Urban populations in Cologne consist of clones of diverse western European lines**

264 In order to determine the extent of genomic variation and the history of population establishment,  
265 we genotyped 5-17 individuals per population as well as plants sampled from additional sites  
266 scattered across the study area. In total, we genotyped about 1% of the genome of 149 individuals

267 using RAD-sequencing (Table S3). Individuals were overall highly homozygous (>99%), indicating that  
268 self-fertilization dominates in Cologne populations. Populations showed a strong genetic structure,  
269 as can be seen from the genetic distance matrix (Figure 3a): Populations BER, GHU, RKO, and SHY  
270 consisted exclusively of genetically identical individuals, with the exception of a single plant with high  
271 heterozygosity from the GHU site. Populations BIS, HLU, KAS, and MIL each consisted of two  
272 genotypes. The genotype of plants collected in 2016 was the same as that of individuals collected in  
273 2017 in the same location, confirming that local populations are most often formed from one  
274 (maximum two) single genotypes that persist over years.

275 Genotypes of the Cologne samples were compared to the European genotypes of the 1001-genome  
276 collection (Alonso-Blanco et al., 2016) by running a principle component analysis (PCA) on a subset of  
277 representative genotypes from both datasets (see Materials and Methods). Cologne samples co-  
278 localize with western and Central European accessions, especially with accessions from Germany,  
279 France, the Netherlands, and the UK, but they did not form a defined subgroup separate from the  
280 other genotypes (Figure 3b, c, supplemental Figure 5). In conclusion, at each site, collected *A.*  
281 *thaliana* individuals formed either one or two clonal lineages. The level of nucleotide diversity of  
282 these lineages reflects region-wide levels of diversity.

283

#### 284 **Cologne urban populations show genetic variation in flowering time and dormancy regulation**

285 Variation in genetic pathways regulating flowering time and germination may contribute to life-  
286 history differences recorded on-site. To link the germination and flowering behavior of the urban  
287 genotypes to knowledge about these well-studied pathways, we analyzed flowering under standard  
288 conditions in a randomized block design and included the well-studied lab strain Col-0 as a reference.  
289 In total, three controlled environmental conditions were set: long days (LD), short days (SD), and a  
290 combination of short days/vernalization/long days (SDV). This setup thus allowed us to thoroughly  
291 examine genetic variation in the regulation of flowering time. The first two conditions allowed us to  
292 derive photoperiod-dependent differences in the regulation of flowering; the third mimicked the  
293 succession of environmental cues experienced in the fall, winter, and spring (Andrés & Coupland,  
294 2012). Differences between LD and SDV conditions revealed variation in vernalization requirements,  
295 because it reveals the extent to which flowering time differences in LD tend to decrease in SDV as a  
296 result of exposure to the cold temperatures.

297 Flowering times differed between genotypes under all conditions ( $F_{12,134\text{to}158} > 39.53$ ,  $p < 2 \times 10^{-16}$ ) and the  
298 interaction between genotype and experimental condition was significant ( $F_{24,461} = 36.72$ ,  $p < 2 \times 10^{-16}$ ).  
299 Under LD conditions, BER and RKO plants flowered as early as the early flowering reference genotype  
300 Col-0, whereas BIS2 plants had not flowered after 105 days, indicating that the former do not require

301 vernalization to flower (Figure 4a, Table S5). Under SD conditions, several genotypes flowered  
302 significantly earlier than Col-0, indicating that natural Cologne genotypes were prone to flower either  
303 in the short days of the fall or the late winter: RKO plants flowered earliest; BER, KAD1, KAD2, and  
304 MIL1 flowered only slightly earlier than Col-0. Both genotypes from the BIS site were unable to  
305 flower under SD conditions and were thus unlikely to flower in the fall (Figure 4b). When plants were  
306 grown under conditions simulating winter (SDV), most genotypes flowered within a narrow time  
307 period, with only BIS2 displaying significantly later flowering (Figure 4c). This experiment  
308 demonstrated that there is considerable variation in how the 12 Cologne genotypes regulate  
309 flowering time. The magnitude of these differences depended on photoperiod and vernalization.

310 The genotypes also differed in how they regulated germination (Table S6). After three months of  
311 seed storage at room temperature, germination assays revealed that the genotypes differed in  
312 primary and secondary dormancy. When seeds were untreated, their germination rates indicated  
313 levels of primary dormancy (Baskin & Baskin, 2004; Finkelstein et al., 2008). Untreated seeds of BER,  
314 BIS2, MIL1, and MIL2 plants had high germination rates, whereas seeds of plants from the other  
315 genotypes had a less than 50% germination rate ( $\chi^2$ , df=11, N=48,  $p < 2.2e^{-16}$ ; Figure 5a). Incubating  
316 non-dormant seeds at very low (-21°C) or high (35 °C) temperatures induced variable levels of  
317 secondary dormancy in Cologne genotypes, as indicated by a significant interaction between  
318 genotypes and germination conditions (likelihood ratio test,  $\chi^2 = 83.2$ , df=24,  $p = 1.81e^{-8}$ , Figure 5c and  
319 supplemental Figure S6).

320

### 321 **Outdoor common garden experiments confirm differences in germination and flowering regulation** 322 **under field conditions**

323 The 12 genotypes were further assayed in an outdoor common garden located in Cologne, and the  
324 genetic variation underlying their differences in survival and fertility was quantified. Here again, we  
325 included the widely used genotype Col-0 in the experiment as a reference (Table S7a-b). Since  
326 phenological variation is known to depend on the timing of germination, seeds were sown directly  
327 into pots at a field site in late August, mid-September, early November (6 weeks, 9 weeks, and 3  
328 months after harvest), and the end of February. As pots were not watered artificially, germination  
329 and further development depended on natural rainfall and temperature. Germination rates among  
330 genotypes strongly differed in the August and September sowing cohorts. In the August cohort, 43  
331 days after seeds were sown, only Col-0 plants had germinated to 100%; BER and MIL1 showed 43 and  
332 28 % germination, respectively, 10 % or fewer of the seeds of the other genotypes had germinated  
333 (differences between the genotypes:  $F_{12,195} = 16.97$ ,  $p < 2e^{-16}$ , Figure 5c). In the September cohort, 15  
334 days after seeds were sown, most genotypes had germinated at 80% or more, and only HLU1, GHU,

335 and SGY had germinated at less than 60% (after 22 d:  $F_{12,195}=15.84$ ,  $p<2e-16$ ; Figure 5d). Eventually,  
336 most seed germinated, but the most delayed was the August cohort (supplemental figure 7a-d).  
337 Later germination in this cohort can be explained by heat-induced secondary dormancy. In contrast,  
338 differences in germination for the November and February cohorts were minor (supplemental figure  
339 7e,f).

340 More than 95 % of the germinated seedlings survived until seed set. Most flowered in spring with the  
341 exception of the Col-0 and BER plants from the August cohort, which germinated almost immediately  
342 and flowered already in late autumn/winter. Differences in flowering time, which were observed for  
343 each of the four cohorts ( $F_{12,195}>13.33$ ,  $p<2 e^{-16}$ ), revealed a significant interaction between genotype  
344 and sowing date ( $F_{34,755}= 20.89$ ,  $p<2e^{-16}$ , Table 2, figure 4d, supplemental figure 8). Flowering times  
345 observed for the 12 genotypes were generally not correlated across the various common garden  
346 cohorts grown outdoor, with the exception of the February and September cohorts (supplemental  
347 Figure 9). Fertility among the genotypes, determined by the number of fruits per pot, differed  
348 between the genotypes for the August, September, and November cohorts ( $F_{12,195}=3.072$ ,  $p=0.00054$ ;  
349  $F_{12,194}=7.721$ ,  $p=1.15e^{-12}$ ; and  $F_{12,195}=4.702$ ,  $p=1.01e^{-06}$ ). Again, a significant interaction between  
350 genotype and seed-sowing date was observed ( $F_{24,584}=3.534$ ,  $p= 4.75e^{-08}$ ). For the August cohort, only  
351 two genotypes (RKO and SGY) were less fertile than most of the genotypes (Table 2, supplemental  
352 Figure 10). Fitness differences for the plants grown from seeds sown in February, all of which  
353 germinated within a week in early March and flowered 23-39 days later, were not significant. With  
354 52% of the plants dying after an unusually warm dry spell in May, the average fitness of the spring  
355 cohort was low .

356

357 **Table 2.** Flowering dates and fertility of Cologne lines and Col-0 grown in common garden  
358 experiments (averages and standard deviation). Seeds were sown on dry soil on August 23,  
359 September 20, November 8, or February 6, and grown without artificial watering. Letters indicate  
360 significant differences at a level  $p<0,05$ .

| Genotype | flowering date (day of year) |                           |                           |                            | fruits/pot                   |                              |                           |                          | fruits/plant |
|----------|------------------------------|---------------------------|---------------------------|----------------------------|------------------------------|------------------------------|---------------------------|--------------------------|--------------|
|          | August                       | September                 | November                  | February                   | August                       | September                    | November                  | February                 |              |
| BER      | 59.3 (13.0) <sup>b</sup>     | 79.1 (2.3) <sup>ab</sup>  | 101.0 (0.4) <sup>a</sup>  | 126.1 (2.3) <sup>abc</sup> | 176.9 (109.2) <sup>abc</sup> | 255.5 (59.8) <sup>d</sup>    | 72.2 (11.2) <sup>b</sup>  | 27.5 (45.9) <sup>a</sup> |              |
| BIS1     | 79.6 (4.2) <sup>a</sup>      | 69.1 (3.3) <sup>def</sup> | 92.7 (1.7) <sup>ef</sup>  | 126.1 (1.1) <sup>abc</sup> | 209.4 (80.7) <sup>abc</sup>  | 301.3 (68.6) <sup>bcd</sup>  | 75.8 (9.6) <sup>b</sup>   | 42.8 (34.1) <sup>a</sup> |              |
| BIS2     | 83.5 (3.6) <sup>a</sup>      | 81.7 (2.0) <sup>a</sup>   | 95.1 (1.5) <sup>cd</sup>  | 127.2 (1.8) <sup>a</sup>   | 201.1 (97.0) <sup>abc</sup>  | 276.1 (103.8) <sup>bcd</sup> | 93.4 (23.6) <sup>ab</sup> | 30.0 (35.2) <sup>a</sup> |              |
| GHU      | 82.4 (17.5) <sup>a</sup>     | 81.1 (3.5) <sup>a</sup>   | 102.6 (0.8) <sup>a</sup>  | 124.1 (1.4) <sup>bcd</sup> | 153.7 (98.2) <sup>bc</sup>   | 249.7 (94.5) <sup>d</sup>    | 77.8 (13.4) <sup>b</sup>  | 12.9 (23.9) <sup>a</sup> |              |
| HLU1     | 76.8 (6.1) <sup>a</sup>      | 70.6 (5.6) <sup>cde</sup> | 91.1 (3.0) <sup>f</sup>   | 121.6 (3.1) <sup>de</sup>  | 183.1 (85.5) <sup>abc</sup>  | 253.6 (83.7) <sup>d</sup>    | 77.3 (26.1) <sup>b</sup>  | 33.8 (24.8) <sup>a</sup> |              |
| HLU2     | 76.6 (8.9) <sup>a</sup>      | 70.5 (3.9) <sup>cde</sup> | 92.0 (2.6) <sup>f</sup>   | 125.8 (1.8) <sup>abc</sup> | 161.7 (94.8) <sup>bc</sup>   | 226.5 (49.7) <sup>d</sup>    | 75.9 (18.8) <sup>b</sup>  | 24.0 (33.9) <sup>a</sup> |              |
| KAD1     | 80.4 (6.5) <sup>a</sup>      | 64.4 (5.2) <sup>f</sup>   | 94.6 (0.8) <sup>de</sup>  | 118.6 (1.4) <sup>f</sup>   | 193.9 (95.7) <sup>abc</sup>  | 371.9 (114.2) <sup>abc</sup> | 89.5 (21.5) <sup>ab</sup> | 10.3 (18.8) <sup>a</sup> |              |
| KAD2     | 76.3 (5.1) <sup>a</sup>      | 66.3 (4.0) <sup>ef</sup>  | 94.8 (1.0) <sup>cde</sup> | 123.4 (3.7) <sup>cd</sup>  | 295.1 (138.1) <sup>a</sup>   | 429.8 (118.8) <sup>a</sup>   | 108.4 (14.5) <sup>a</sup> | 14.1 (22.1) <sup>a</sup> |              |
| MIL1     | 75.6 (8.7) <sup>a</sup>      | 72.9 (3.3) <sup>c</sup>   | 94.7 (1.0) <sup>cde</sup> | 124.3 (1.0) <sup>bc</sup>  | 211.4 (128.3) <sup>abc</sup> | 264.0 (69.9) <sup>cd</sup>   | 80.9 (11.1) <sup>b</sup>  | 27.8 (35.4) <sup>a</sup> |              |
| MIL2     | 81.9 (5.0) <sup>a</sup>      | 80.2 (3.6) <sup>a</sup>   | 97.0 (2.9) <sup>bc</sup>  | 126.9 (2.5) <sup>ab</sup>  | 244.0 (90.8) <sup>abc</sup>  | 261.8 (102.0) <sup>d</sup>   | 86.6 (11.2) <sup>ab</sup> | 27.9 (38.0) <sup>a</sup> |              |
| RKO      | 73.3 (10.4) <sup>a</sup>     | 51.8 (5.5) <sup>e</sup>   | 100.6 (1.9) <sup>a</sup>  | 119.3 (2.0) <sup>ef</sup>  | 140.5 (99.1) <sup>c</sup>    | 373.8 (60.1) <sup>ab</sup>   | 80.6 (25.4) <sup>b</sup>  | 39.4 (37.2) <sup>a</sup> |              |
| SGY      | 80.8 (9.8) <sup>a</sup>      | 74.9 (4.0) <sup>bc</sup>  | 94.6 (1.9) <sup>de</sup>  | 124.3 (2.3) <sup>bc</sup>  | 142.9 (92.6) <sup>c</sup>    | 220.9 (108.3) <sup>d</sup>   | 75.4 (25.8) <sup>b</sup>  | 22.8 (31.6) <sup>a</sup> |              |
| Col-0    | 54.6 (12.3) <sup>b</sup>     | 74.9 (3.9) <sup>bc</sup>  | 97.8 (2.2) <sup>b</sup>   | 125.0 (2.9) <sup>abc</sup> | 273.5 (149.1) <sup>ab</sup>  | 261.7 (81.0) <sup>d</sup>    | 71.9 (12.3) <sup>b</sup>  | 38.8 (19.6) <sup>a</sup> |              |

361

362

363 In summary, plants from the 12 Cologne genotypes displayed remarkable genetic differences in their  
 364 ability to control germination and flowering in common garden experiments. Flowering times  
 365 measured in controlled growth chamber and in the common garden were significantly correlated,  
 366 but correlation depended on the various experimental indoor conditions and/or the seed dispersal  
 367 times characterizing the different common garden cohorts (supplemental Figure 9).

368 **Environmental variation among sites of origin correlates with genetic variation observed in**  
 369 **common gardens and controlled environments**

370 The phenotypes of urban *A. thaliana* individuals *in situ* correlates with the ecological characteristics  
 371 of the sites in which they are monitored. We further tested whether the distribution of genetic  
 372 differences revealed in common gardens and under lab conditions is independent of the ecological  
 373 characteristics at the sites of origin. We found that genetic variation in the rate of germination under  
 374 late summer conditions in the August cohort or after cold treatment correlates positively with  
 375 variation in the severity of disturbance ( $r=0.763$ ,  $p=0.0039$  and  $r=0.816$ ,  $p=0.0012$ , respectively).  
 376 Furthermore, in the absence of vernalization, genetic variation in the regulation of flowering  
 377 correlates negatively with variation in disturbance severity and temperatures (e.g., indicator value T  
 378 (flowering date in LD or SD):  $r=-0.814$  and  $-0.806$ ;  $p=0.0013$  and  $0.0016$ ; Figure 6, supplemental  
 379 Figure 11). Genetic variation in phenology is thus not randomly distributed across habitats. Its  
 380 distribution matches the disturbance gradient along which the *A. thaliana* plant populations  
 381 monitored in this study are distributed.

382 Both genetic variation for the regulation of flowering time in LD conditions and phenotypic variation  
 383 for flowering time *in situ* were correlated with disturbance frequency, but the slope of the  
 384 relationship changed signed ( $F_{1,20}=14.6984$ ,  $p=0.001$ , Figure 6, supplemental Figure 12). We conclude

385 that genetic variants accelerating flowering in the absence of vernalization are found in the most  
386 disturbed sites, where plants are observed to flower at a later date.

387

## 388 **Discussion**

389 Urban habitats form a mosaic of diverse environments that pose serious challenges to plant growth.  
390 By combining plant community and trait-based ecological measurements with analysis of genetic  
391 diversity at the genomic and phenological levels, we provide compelling evidence that the genetic  
392 variation in *A. thaliana* is not randomly distributed across environmentally diverse urban habitats. *A.*  
393 *thaliana* populations sampled here confirm previous reports about urban populations (Bombliet et  
394 al., 2010): Each habitat patch is colonized by one, sometimes two, clonal lineages. An analysis of  
395 genomic variation showed that these lineages belong to the broadly distributed gene pool of  
396 northwestern European *A. thaliana* genotypes, supporting the notion that urban city patches were  
397 established from a pool of regionally diverse migrants. Furthermore, our study shows that the urban  
398 habitats hosting spontaneously occurring *A. thaliana* stands are heterogeneous. The advantage of  
399 ecological characteristics based on community indicators, which leverage the particularly extensive  
400 information available for the German flora, is that they provide robust measures of environmental  
401 variation (Diekmann, 2003; Fanelli et al., 2006). Here, these characteristics reveal that *A. thaliana*  
402 habitats form a continuum of varying levels of humidity and nutrients, as well as varying frequencies  
403 of disturbance. Environmental variation is thought to help shape the diversity of plant communities  
404 by filtering out ill-suited species (Guo et al., 2018; Kraft et al., 2015; Laliberté et al., 2014; Yang et al.,  
405 2022). The ecological differences we quantified were clearly associated with the phenotypic  
406 differences displayed by plants *in situ*, as plants growing under better edaphic conditions (more  
407 nutrients, more water) were larger, and plants growing in disturbed habitats bolted later and bore  
408 more fruits. However, plant plasticity in response to environmental variation, as well as to  
409 environmental filtering, may explain the patterns of covariation we found (Aguilar-Trigueros et al.,  
410 2017; Cadotte & Tucker, 2017; Thakur & Wright, 2017).

411 Focusing on the 12 clonal lineages identified by genomic analysis, we thus explored whether genetic  
412 variation underpins the phenological variation observed *in situ*. By comparing the lineages forming  
413 each population patch under common growth conditions, we found strong genetic differences in  
414 how they regulate seed germination and flowering. In total, we relied on at least seven indoor and  
415 outdoor common garden conditions to show that the 12 clonal lineages varied in their requirements  
416 for vernalization and their ability to flower during shortening daylength, as well as in the ability of  
417 their seeds to delay germination after exposure to cold and heat. We further showed that differences



418 observed in controlled growth chambers also manifested in the more realistic conditions of an  
419 outdoor common garden (Wilczek et al., 2009).

420 Importantly, we observed that the genetic differences between clonal lineages were not randomly  
421 distributed across the contrasting environmental conditions that characterize the eight sites studied  
422 here. Considering that the assessment of variation *in situ* and at the genetic level constrained us to  
423 the study of only 8 populations, our findings suggest that urban environmental heterogeneity has a  
424 strong filtering power on the genetic basis of intraspecific trait variation. By contrasting variation in  
425 plant traits expressed *in situ* with *ex situ* observations made in common garden settings, we showed  
426 that genetic variation in phenology tends to buffer the effect that environmental heterogeneity has  
427 on trait variation. Indeed, we found that genotypes that flowered early under LD or SD conditions (*ex*  
428 *situ*) were found in sites that were more disturbed, but not in the less disturbed one where plants  
429 flowered early *in situ* (Figure 6). Indeed, the timing of flowering in LD conditions and *in situ* showed  
430 opposite patterns of covariation with disturbance frequency (Figure 6). In other words, genotypes  
431 growing in habitats with particularly harsh environmental conditions (characterized by resource  
432 stress, frequent disturbance, and a delay in development) tend to have traits genetically tailored to a  
433 life cycle that is shorter in the absence of vernalization. We hypothesize that this particularly ruderal  
434 strategy is promoted in habitats where the onset of the life cycle is delayed by human-driven  
435 disturbances, such as mowing and weeding, or where unfavorable abiotic conditions slow plant  
436 growth. Here we reveal a pattern of counter-gradient adaptation, according to which genetic  
437 variation for flowering in LD helps decrease the extent of phenological variation that would  
438 otherwise typify the heterogeneous environments hosting *A. thaliana* in the city (Conover & Schultz,  
439 1995).

440 Quantifying variation in *in situ* and *ex situ* phenology variation highlights both the ecological role of  
441 genetic variation for the regulation of flowering time under long day conditions and the importance  
442 of interdisciplinary approaches in ecology, quantitative genetics, and genomics. For example,  
443 although genomic sequencing sometimes helps verify the occurrence of local adaptation, such an  
444 approach would not benefit this study (Hancock et al., 2011; Savolainen et al., 2013). In contrast to  
445 phenological variation, genome-wide nucleotide diversity is randomly distributed, and clonal  
446 propagation precludes the application of genome-wide association studies (Hancock et al., 2011;  
447 Herden et al., 2019). Similarly, common garden experiments can distinguish plasticity from genetic  
448 variation (Kawecki & Ebert, 2004), but the genetic diversity that can be quantified *ex situ* cannot  
449 directly predict the functional role of either factor in plants grown under natural conditions. It is  
450 ultimately the relationship between environmental variables and *in situ* trait variation that clarifies  
451 the functional role of genetic variation in the regulation of phenology. Individuals with a genetic  
452 make-up that delays flowering time under long-day conditions did not grow in habitats where



453 environmental conditions happened to delay flowering. Such delay may be due to a delay in the  
454 timing of germination in these populations, but it could as well result from slower plant development  
455 in the most disturbed locations.

456 Environmental filters imposed by habitat heterogeneity in cities have been shown to diversify plant  
457 communities (Aronson et al., 2016). Indeed, cities can preserve species diversity, depending, for  
458 example, on the size and connectivity of habitats within cities (Beninde et al., 2015; Hahs et al.,  
459 2009). To the best of our knowledge, this study is the first to show that environmental filtering also  
460 has the potential to maintain functionally diverse and locally adapted genetic lineages. Such lineage  
461 form *bona fide* ecotypes, a term often used in the literature but seldom scrutinized. The dynamics of  
462 adaptation in the populations of this study are possible only because diverse phenological variants  
463 are present in the regional pool of migrants. It is tempting to speculate that this process may  
464 prefigure how plant populations will adapt in the anthropocene.

#### 465 **Acknowledgments**

466 We thank Jessica Thome and Denitsa Ilieva for help in common garden experiments, and Emily  
467 Wheeler, Harwich, MA, for editorial assistance.

#### 468 **Authors' Contributions**

469 AL, JM, GS, AS conceived the ideas and designed the methodology; JM, GS and AL wrote the  
470 manuscript; AF, GS, HD, GC collected and/or analyzed the data; all authors contributed to the draft  
471 and gave final approval for publication. Sequencing data was deposited as submission numbers  
472 ERS5063293 to ERS5063441, project PRJEB40091 in the ENA repository. We acknowledge funding  
473 from the Deutsche Forschungsgemeinschaft within the framework of TRR341.

474

#### 475 **References**

476 Ågren, J., Oakley, C. G., Lundemo, S., & Schemske, D. W. (2017). Adaptive divergence in flowering  
477 time among natural populations of *Arabidopsis thaliana*: Estimates of selection and QTL  
478 mapping. *Evolution*, 71(3), 550–564. <https://doi.org/10.1111/evo.13126>

479 Aguilar-Trigueros, C. A., Rillig, M. C., & Ballhausen, M.-B. (2017). Environmental Filtering Is a Relic. A  
480 Response to Cadotte and Tucker. *Trends in Ecology & Evolution*, 32(12), 882–884.

481 <https://doi.org/10.1016/j.tree.2017.09.013>

- 482 Akiyama, R., & Ågren, J. (2018). Conflicting selection on the timing of germination in a natural  
483 population of *Arabidopsis thaliana*. *Journal of Evolutionary Biology*, *27*(1), 193–199.  
484 <https://doi.org/10.1111/jeb.12293>
- 485 Alonso-Blanco, C., Andrade, J., Becker, C., Bemm, F., Bergelson, J., Borgwardt, K. M., Cao, J., Chae, E.,  
486 Dezwaan, T. M., Ding, W., Ecker, J. R., Exposito-Alonso, M., Farlow, A., Fitz, J., Gan, X., Grimm,  
487 D. G., Hancock, A. M., Henz, S. R., Holm, S., ... Zhou, X. (2016). 1,135 Genomes Reveal the  
488 Global Pattern of Polymorphism in *Arabidopsis thaliana*. *Cell*, *166*(2), 481–491.  
489 <https://doi.org/10.1016/j.cell.2016.05.063>
- 490 Andrés, F., & Coupland, G. (2012). The genetic basis of flowering responses to seasonal cues. *Nature*  
491 *Reviews Genetics*, *13*(9), 627–639. <https://doi.org/10.1038/nrg3291>
- 492 Ansmann, L., Vennedey, V., Hillen, H. A., Stock, S., Kuntz, L., Pfaff, H., Mannion, R., Hower, K. I., &  
493 Cologne Research And Development Network CoRe-Net Study Group, C. R. A. D. N. C.-N. S. G.  
494 (2021). Resource dependency and strategy in healthcare organizations during a time of  
495 scarce resources: Evidence from the metropolitan area of cologne. *Journal of Health*  
496 *Organization and Management*, *35*(9), 211–227. [https://doi.org/10.1108/JHOM-12-2020-](https://doi.org/10.1108/JHOM-12-2020-0478)  
497 [0478](https://doi.org/10.1108/JHOM-12-2020-0478)
- 498 Aronson, M. F. J., Nilon, C. H., Lepczyk, C. A., Parker, T. S., Warren, P. S., Cilliers, S. S., Goddard, M. A.,  
499 Hahs, A. K., Herzog, C., Katti, M., La Sorte, F. A., Williams, N. S. G., & Zipperer, W. (2016).  
500 Hierarchical filters determine community assembly of urban species pools. *Ecology*, *97*(11),  
501 2952–2963. <https://doi.org/10.1002/ecy.1535>
- 502 Baskin, J. M., & Baskin, C. C. (2004). A classification system for seed dormancy. *Seed Science*  
503 *Research*, *14*(1), 1–16.
- 504 Beninde, J., Veith, M., & Hochkirch, A. (2015). Biodiversity in cities needs space: A meta-analysis of  
505 factors determining intra-urban biodiversity variation. *Ecology Letters*, *18*(6), 581–592.  
506 <https://doi.org/10.1111/ele.12427>
- 507 Bomblies, K., Yant, L., Laitinen, R. A., Kim, S.-T., Hollister, J. D., Warthmann, N., Fitz, J., & Weigel, D.  
508 (2010). Local-Scale Patterns of Genetic Variability, Outcrossing, and Spatial Structure in

- 509 Natural Stands of *Arabidopsis thaliana*. *PLoS Genetics*, 6(3), e1000890.  
510 <https://doi.org/10.1371/journal.pgen.1000890.g005>
- 511 Bonthoux, S., Voisin, L., Bouché-Pillon, S., & Chollet, S. (2019). More than weeds: Spontaneous  
512 vegetation in streets as a neglected element of urban biodiversity. *Landscape and Urban  
513 Planning*, 185, 163–172. <https://doi.org/10.1016/j.landurbplan.2019.02.009>
- 514 Cadotte, M. W., & Tucker, C. M. (2017). Should Environmental Filtering be Abandoned? *Trends in  
515 Ecology & Evolution*, 32(6), 429–437. <https://doi.org/10.1016/j.tree.2017.03.004>
- 516 Castilla, A. R., Méndez-Vigo, B., Marcer, A., Martínez-Minaya, J., Conesa, D., Picó, F. X., & Alonso-  
517 Blanco, C. (2020). Ecological, genetic and evolutionary drivers of regional genetic  
518 differentiation in *Arabidopsis thaliana*. *BMC Evolutionary Biology*, 20(1), 71.  
519 <https://doi.org/10.1186/s12862-020-01635-2>
- 520 Chatzidimitriou, A., & Yannas, S. (2015). Microclimate development in open urban spaces: The  
521 influence of form and materials. *Energy and Buildings*, 108, 156–174.  
522 <https://doi.org/10.1016/j.enbuild.2015.08.048>
- 523 Cheptou, P.-O., Carrue, O., Rouifed, S., & Cantarel, A. (2008). Rapid evolution of seed dispersal in an  
524 urban environment in the weed *Crepis sancta*. *Proceedings of the National Academy of  
525 Sciences*, 105(10), 3796–3799. <https://doi.org/10.1073/pnas.0708446105>
- 526 Chmielewski, F.-M., & Rötzer, T. (2001). Response of tree phenology to climate change across  
527 Europe. *Agricultural and Forest Meteorology*, 108(2), 101–112.  
528 [https://doi.org/10.1016/S0168-1923\(01\)00233-7](https://doi.org/10.1016/S0168-1923(01)00233-7)
- 529 Conover, D. O., & Schultz, E. T. (1995). Phenotypic similarity and the evolutionary significance of  
530 countergradient variation. *Trends in Ecology & Evolution*, 10(6), 248–252.  
531 [https://doi.org/10.1016/S0169-5347\(00\)89081-3](https://doi.org/10.1016/S0169-5347(00)89081-3)
- 532 Debieu, M., Tang, C., Stich, B., Sikosek, T., EFFGEN, S., Josephs, E., Schmitt, J., Nordborg, M.,  
533 Koornneef, M., & de Meaux, J. (2013). Co-Variation between Seed Dormancy, Growth Rate  
534 and Flowering Time Changes with Latitude in *Arabidopsis thaliana*. *PLoS ONE*, 8(5), e61075.  
535 <https://doi.org/10.1371/journal.pone.0061075.s002>

- 536 DeLeo, V. L., Menge, D. N. L., Hanks, E. M., Juenger, T. E., & Lasky, J. R. (2020). Effects of two  
537 centuries of global environmental variation on phenology and physiology of *Arabidopsis*  
538 *thaliana*. *Global Change Biology*, *26*(2), 523–538. <https://doi.org/10.1111/gcb.14880>
- 539 Diekmann, M. (2003). Species indicator values as an important tool in applied plant ecology – a  
540 review. *Basic and Applied Ecology*, *4*(6), 493–506. <https://doi.org/10.1078/1439-1791-00185>
- 541 Dittberner, H., Becker, C., Jiao, W.-B., Schneeberger, K., Hölzel, N., Tellier, A., & Meaux, J. de. (2019).  
542 Strengths and potential pitfalls of hay transfer for ecological restoration revealed by RAD-seq  
543 analysis in floodplain *Arabis* species. *Molecular Ecology*, *28*(17), 3887–3901.  
544 <https://doi.org/10.1111/mec.15194>
- 545 Dubin, M. J., Zhang, P., Meng, D., Remigereau, M.-S., Osborne, E. J., Paolo Casale, F., Drewe, P.,  
546 Kahles, A., Jean, G., Vilhjálmsson, B., Jagoda, J., Irez, S., Voronin, V., Song, Q., Long, Q.,  
547 Rättsch, G., Stegle, O., Clark, R. M., & Nordborg, M. (2015). DNA methylation in *Arabidopsis*  
548 has a genetic basis and shows evidence of local adaptation. *ELife*, *4*, e05255.  
549 <https://doi.org/10.7554/eLife.05255>
- 550 Dubois, J., & Cheptou, P.-O. (2017). Effects of fragmentation on plant adaptation to urban  
551 environments. *Philosophical Transactions of the Royal Society B: Biological Sciences*,  
552 *372*(1712), 20160038. <https://doi.org/10.1098/rstb.2016.0038>
- 553 Durvasula, A., Fulgione, A., Gutaker, R. M., Alacakaptan, S. I., Flood, P. J., Neto, C., Tsuchimatsu, T.,  
554 Burbano, H. A., Picó, F. X., Alonso-Blanco, C., & Hancock, A. M. (2017). African genomes  
555 illuminate the early history and transition to selfing in *Arabidopsis thaliana*. *Proceedings of*  
556 *the National Academy of Sciences of the United States of America*, *209*, 201616736.
- 557 Ellenberg, H., & Leuschner, C. (2010). *Vegetation Mitteleuropas mit den Alpen: In ökologischer,*  
558 *dynamischer und historischer Sicht*. UTB.
- 559 Exposito-Alonso, M., Vasseur, F., Ding, W., Wang, G., Burbano, H. A., & Weigel, D. (2018). Genomic  
560 basis and evolutionary potential for extreme drought adaptation in *Arabidopsis thaliana*.  
561 *Nature Ecology & Evolution*, *2*(2), 352–358. <https://doi.org/10.1038/s41559-017-0423-0>

- 562 Fanelli, G., Tescarollo, P., & Testi, A. (2006). Ecological indicators applied to urban and suburban  
563 floras. *Ecological Indicators*, 6(2), 444–457. <https://doi.org/10.1016/j.ecolind.2005.06.002>
- 564 Finkelstein, R., Reeves, W., Ariizumi, T., & Steber, C. (2008). Molecular Aspects of Seed Dormancy.  
565 *Annual Review of Plant Biology*, 59(1), 387–415.  
566 <https://doi.org/10.1146/annurev.arplant.59.032607.092740>
- 567 Foti, L. (2017). *Assesment of the urban pressure effects on soil quality in the Paris region under two*  
568 *types of vegetation (lawns and woods)*. [https://tel.archives-ouvertes.fr/tel-](https://tel.archives-ouvertes.fr/tel-02393689/file/2017PA066481.pdf)  
569 [02393689/file/2017PA066481.pdf](https://tel.archives-ouvertes.fr/tel-02393689/file/2017PA066481.pdf)
- 570 Fournier-Level, A., Korte, A., Cooper, M. D., Nordborg, M., Schmitt, J., & Wilczek, A. M. (2011). A map  
571 of local adaptation in *Arabidopsis thaliana*. *Science*, 334(6052), 86–89.  
572 <https://doi.org/10.1126/science.1209271>
- 573 Gibson, D. J. (2014). *Methods in Comparative Plant Population Ecology*.  
574 <https://doi.org/10.1093/acprof:oso/9780199671465.001.0001>
- 575 Gilbert, O. (2012). *The Ecology of Urban Habitats*. Springer Science & Business Media.
- 576 Gorton, A. J., Moeller, D. A., & Tiffin, P. (2018). Little plant, big city: A test of adaptation to urban  
577 environments in common ragweed (*Ambrosia artemisiifolia*). *Proceedings of the Royal*  
578 *Society B: Biological Sciences*, 285(1881), 20180968. <https://doi.org/10.1098/rspb.2018.0968>
- 579 Guo, P., Yu, F., Ren, Y., Liu, D., Li, J., Ouyang, Z., & Wang, X. (2018). Response of Ruderal Species  
580 Diversity to an Urban Environment: Implications for Conservation and Management.  
581 *International Journal of Environmental Research and Public Health*, 15(12), 2832.  
582 <https://doi.org/10.3390/ijerph15122832>
- 583 Hahs, A. K., McDonnell, M. J., McCarthy, M. A., Vesk, P. A., Corlett, R. T., Norton, B. A., Clemants, S.  
584 E., Duncan, R. P., Thompson, K., Schwartz, M. W., & Williams, N. S. G. (2009). A global  
585 synthesis of plant extinction rates in urban areas. *Ecology Letters*, 12(11), 1165–1173.  
586 <https://doi.org/10.1111/j.1461-0248.2009.01372.x>
- 587 Halbritter, A. H., Fior, S., Keller, I., Billeter, R., Edwards, P. J., Holderegger, R., Karrenberg, S., Pluess,  
588 A. R., Widmer, A., & Alexander, J. M. (2018). Trait differentiation and adaptation of plants

- 589 along elevation gradients. *Journal of Evolutionary Biology*, 31(6), 784–800.
- 590 <https://doi.org/10.1111/jeb.13262>
- 591 Hancock, A. M., Brachi, B., Faure, N., Horton, M. W., Jarymowycz, L. B., Sperone, F. G., Toomajian, C.,
- 592 Roux, F., & Bergelson, J. (2011). Adaptation to climate across the *Arabidopsis thaliana*
- 593 genome. *Science*, 334(6052), 83–86. <https://doi.org/10.1126/science.1209244>
- 594 Herben, T., Chytrý, M., & Klimešová, J. (2016). A quest for species-level indicator values for
- 595 disturbance. *Journal of Vegetation Science*, 27(3), 628–636.
- 596 <https://doi.org/10.1111/jvs.12384>
- 597 Herden, J., Eckert, S., Stift, M., Joshi, J., & van Kleunen, M. (2019). No evidence for local adaptation
- 598 and an epigenetic underpinning in native and non-native ruderal plant species in Germany.
- 599 *Ecology and Evolution*, 9(17), 9412–9426. <https://doi.org/10.1002/ece3.5325>
- 600 Huang, L., Koubek, T., Weiser, M., & Herben, T. (2018). Environmental drivers and phylogenetic
- 601 constraints of growth phenologies across a large set of herbaceous species. *Journal of*
- 602 *Ecology*, 106(4), 1621–1633. <https://doi.org/10.1111/1365-2745.12927>
- 603 Johnson, M. T. J., & Munshi-South, J. (2017). Evolution of life in urban environments. *Science*,
- 604 358(6363), eaam8327. <https://doi.org/10.1126/science.aam8327>
- 605 Kawecki, T. J., & Ebert, D. (2004). Conceptual issues in local adaptation. *Ecology Letters*, 7(12), 1225–
- 606 1241. <https://doi.org/10.1111/j.1461-0248.2004.00684.x>
- 607 Kollmann, J., & Fischer, A. (2003). Vegetation as indicator for habitat quality. *Basic and Applied*
- 608 *Ecology*, 4(6), 489–491. <https://doi.org/10.1078/1439-1791-00209>
- 609 Kraft, N. J. B., Adler, P. B., Godoy, O., James, E. C., Fuller, S., & Levine, J. M. (2015). Community
- 610 assembly, coexistence and the environmental filtering metaphor. *Functional Ecology*, 29(5),
- 611 592–599. <https://doi.org/10.1111/1365-2435.12345>
- 612 Kronholm, I., Picó, F. X., Alonso-Blanco, C., Goudet, J., & Meaux, J. de. (2012). Genetic Basis of
- 613 Adaptation in *Arabidopsis thaliana*: Local Adaptation at the Seed Dormancy QTL DOG1.
- 614 *Evolution*, 66(7), 2287–2302. <https://doi.org/10.1111/j.1558-5646.2012.01590.x>

- 615 Laliberté, E., Zemunik, G., & Turner, B. L. (2014). Environmental filtering explains variation in plant  
616 diversity along resource gradients. *Science*, *345*(6204), 1602–1605.  
617 <https://doi.org/10.1126/science.1256330>
- 618 Lambrecht, S. C., Mahieu, S., & Cheptou, P.-O. (2016). Natural selection on plant physiological traits  
619 in an urban environment. *Acta Oecologica*, *77*, 67–74.  
620 <https://doi.org/10.1016/j.actao.2016.09.002>
- 621 Le Corre, V. (2005). Variation at two flowering time genes within and among populations of  
622 *Arabidopsis thaliana*: Comparison with markers and traits. *Molecular Ecology*, *14*(13), 4181–  
623 4192.
- 624 LEIMU, R., & Fischer, M. (2008). A meta-analysis of local adaptation in plants. *PLoS ONE*, *3*(12),  
625 e4010. <https://doi.org/10.1371/journal.pone.0004010>
- 626 Lenssen, J. P. M., van Kleunen, M., Fischer, M., & de Kroon, H. (2004). Local Adaptation of the Clonal  
627 Plant *Ranunculus reptans* to Flooding along a Small-Scale Gradient. *Journal of Ecology*, *92*(4),  
628 696–706.
- 629 Li, D., Stucky, B. J., Deck, J., Baiser, B., & Guralnick, R. P. (2019). The effect of urbanization on plant  
630 phenology depends on regional temperature. *Nature Ecology & Evolution*, *3*(12), 1661–1667.  
631 <https://doi.org/10.1038/s41559-019-1004-1>
- 632 Liu, Y., Li, G., Wu, X., Niklas, K. J., Yang, Z., & Sun, S. (2021). Linkage between species traits and plant  
633 phenology in an alpine meadow. *Oecologia*, *195*(2), 409–419.  
634 <https://doi.org/10.1007/s00442-020-04846-y>
- 635 Luo, Y., Widmer, A., & Karrenberg, S. (2015). The roles of genetic drift and natural selection in  
636 quantitative trait divergence along an altitudinal gradient in *Arabidopsis thaliana*. *Heredity*,  
637 *114*(2), 220–228. <https://doi.org/10.1038/hdy.2014.89>
- 638 Nord, E. A., & Lynch, J. P. (2009). Plant phenology: A critical controller of soil resource acquisition.  
639 *Journal of Experimental Botany*, *60*(7), 1927–1937. <https://doi.org/10.1093/jxb/erp018>
- 640 Nordt, B., Hensen, I., Bucher, S. F., Freiberg, M., Primack, R. B., Stevens, A.-D., Bonn, A., Wirth, C.,  
641 Jakubka, D., Plos, C., Sporbert, M., & Römermann, C. (2021). The PhenObs initiative: A



642 standardised protocol for monitoring phenological responses to climate change using  
643 herbaceous plant species in botanical gardens. *Functional Ecology*, 35(4), 821–834.  
644 <https://doi.org/10.1111/1365-2435.13747>

645 Orr, H. A. (2005). The genetic theory of adaptation: A brief history. *Nature Reviews Genetics*, 6(2),  
646 119–127. <https://doi.org/10.1038/nrg1523>

647 Piao, S., Liu, Q., Chen, A., Janssens, I. A., Fu, Y., Dai, J., Liu, L., Lian, X., Shen, M., & Zhu, X. (2019). Plant  
648 phenology and global climate change: Current progresses and challenges. *Global Change*  
649 *Biology*, 25(6), 1922–1940. <https://doi.org/10.1111/gcb.14619>

650 Primack, R. B., & Miller-Rushing, A. J. (2012). Uncovering, Collecting, and Analyzing Records to  
651 Investigate the Ecological Impacts of Climate Change: A Template from Thoreau’s Concord.  
652 *BioScience*, 62(2), 170–181. <https://doi.org/10.1525/bio.2012.62.2.10>

653 Robioneck-Selosse, A., Banaś, K., Merdalski, M., & Szmeja, J. (2021). Phenotypic trait variation and life  
654 strategy in *Ranunculus reptans* L. facing water level changes. *Botany Letters*, 168(2), 283–  
655 296. <https://doi.org/10.1080/23818107.2020.1860815>

656 Santangelo, J. S., Ness, R. W., Cohan, B., Fitzpatrick, C. R., Innes, S. G., Koch, S., Miles, L. S., Munim, S.,  
657 Peres-Neto, P. R., Prashad, C., Tong, A. T., Aguirre, W. E., Akinwole, P. O., Alberti, M., Álvarez,  
658 J., Anderson, J. T., Anderson, J. J., Ando, Y., Andrew, N. R., ... Johnson, M. T. J. (2022). Global  
659 urban environmental change drives adaptation in white clover. *Science*, 375(6586), 1275–  
660 1281. <https://doi.org/10.1126/science.abk0989>

661 Savolainen, O., Lascoux, M., & Merilä, J. (2013). Ecological genomics of local adaptation. *Nature*  
662 *Reviews Genetics*, 14(11), 807–820. <https://doi.org/10.1038/nrg3522>

663 Svardal, H., Farlow, A., Exposito-Alonso, M., Ding, W., Novikova, P., Alonso-Blanco, C., Weigel, D., LEE,  
664 C.-R., & Nordborg, M. (2017). On the post-glacial spread of human commensal *Arabidopsis*  
665 *thaliana*. *Nature Communications*, 8, 1–12. <https://doi.org/10.1038/ncomms14458>

666 Szulkin, M., Munshi-South, J., & Charmantier, A. (2020). *Urban Evolutionary Biology*. Oxford  
667 University Press.

- 668 Takou, M., Wieters, B., Kopriva, S., Coupland, G., Linstädter, A., & de Meaux, J. (2019). Linking genes  
669 with ecological strategies in *Arabidopsis thaliana*. *Journal of Experimental Botany*.  
670 <https://doi.org/10.1093/jxb/ery447>
- 671 Thakur, M. P., & Wright, A. J. (2017). Environmental Filtering, Niche Construction, and Trait  
672 Variability: The Missing Discussion. *Trends in Ecology & Evolution*, 32(12), 884–886.  
673 <https://doi.org/10.1016/j.tree.2017.09.014>
- 674 Thompson, K. A., Renaudin, M., & Johnson, M. T. J. (2016). Urbanization drives the evolution of  
675 parallel clines in plant populations. *Proceedings of the Royal Society B: Biological Sciences*,  
676 283(1845), 20162180. <https://doi.org/10.1098/rspb.2016.2180>
- 677 Tresch, S., Moretti, M., Le Bayon, R.-C., Mäder, P., Zanetta, A., Frey, D., & Fließbach, A. (2018). A  
678 Gardener's Influence on Urban Soil Quality. *Frontiers in Environmental Science*, 6.  
679 <https://www.frontiersin.org/article/10.3389/fenvs.2018.00025>
- 680 Vega, K. A., & Küffer, C. (2021). Promoting wildflower biodiversity in dense and green cities: The  
681 important role of small vegetation patches. *Urban Forestry & Urban Greening*, 62, 127165.  
682 <https://doi.org/10.1016/j.ufug.2021.127165>
- 683 Vidal, E. A., Moyano, T. C., Canales, J., & Gutiérrez, R. A. (2014). Nitrogen control of developmental  
684 phase transitions in *Arabidopsis thaliana*. *Journal of Experimental Botany*, 65(19), 5611–5618.  
685 <https://doi.org/10.1093/jxb/eru326>
- 686 Wieters, B., Steige, K. A., He, F., Koch, E. M., Ramos-Onsins, S. E., Gu, H., Guo, Y.-L., Sunyaev, S., &  
687 Meaux, J. de. (2021). Polygenic adaptation of rosette growth in *Arabidopsis thaliana*. *PLOS*  
688 *Genetics*, 17(1), e1008748. <https://doi.org/10.1371/journal.pgen.1008748>
- 689 Wilczek, A. M., Roe, J. L., Knapp, M. C., Cooper, M. D., Lopez-Gallego, C., Martin, L. J., Muir, C. D., Sim,  
690 S., Walker, A., Anderson, J., Egan, J. F., Moyers, B. T., Petipas, R., Giakountis, A., Charbit, E.,  
691 Coupland, G., Welch, S. M., & Schmitt, J. (2009). Effects of genetic perturbation on seasonal  
692 life history plasticity. *Science*, 323(5916), 930–934. <https://doi.org/10.1126/science.1165826>

693 Yang, J., Su, P., Zhou, Z., Shi, R., & Ding, X. (2022). Environmental filtering rather than dispersal  
694 limitation dominated plant community assembly in the Zoige Plateau. *Ecology and Evolution*,  
695 12(7), e9117. <https://doi.org/10.1002/ece3.9117>  
696



## 698 Figure Legends

699 **Fig. 1:** Characteristics of eight urban *Arabidopsis thaliana* populations and their habitat conditions in  
700 the city of Cologne, with (a) differences in size and phenological stage between *A. thaliana* from two  
701 adjacent habitats (both photographs from 2017-04-03); (b) differences between habitat patches  
702 based on plant species' Ellenberg indicator values for soil nutrients and (c) the same based on plant  
703 species' Herben indicator for disturbance frequency. Letters indicate significant differences at  
704  $p < 0.05$ . (d) Similarity of habitat patches based on a PCA with plant communities' average indicator  
705 values for abiotic environmental conditions and disturbances. For indicator names, see Materials and  
706 Methods.

707 **Fig. 2:** Phenological stages and plant functional traits of the eight urban *A. thaliana* populations  
708 measured in-situ, with a) differences in bolting ( $F_{7,149} = 17.81$ ,  $p < 2e^{-16}$ ); b) differences in maximum  
709 rosette diameter ( $F_{7,163} = 10.92$ ,  $p = 2.85e^{-11}$ ). Letters indicate significant differences at  $p < 0.05$ . c)  
710 correlations of populations' average phenological stages and functional traits with abiotic habitat  
711 characteristics given by the accompanying plant community (L -light, T -temperature, K -  
712 continentality, F -humidity, R -pH, N -nitrogen content) and disturbance regimes (disturbance  
713 frequency DF, severity DS, herb-layer structure DV).

714 **Fig. 3:** a) Analysis of genetic distance between progeny of 85 individual plants from 8 sampling sites  
715 in Cologne determined by RAD-sequencing. Individual plants are colour coded according to their  
716 origin. b) Principal component analysis of genetic differences between Cologne plants from the 8  
717 sampling sites (blue), plants from additional sites of the sampling area (red) and selected lines of the  
718 *Arabidopsis* 1001 genome set (grey). Origin of 1001 genome lines is indicated for countries  
719 represented by higher number of accessions (AUT-Austria, CZE-Czech Republic, ESP-Spain, FRA-  
720 France, GER-Germany, ITA-Italy, NED-The Netherlands, SUI-Switzerland, SWE-Sweden, UK-United  
721 Kingdom). c) Magnification of the yellow marked part of the plot b).

722 **Fig. 4:** Flowering time (days after sowing) of plants grown in controlled conditions: long days (16 h  
723 light/20 °C; 8 h dark/18°C) (a), short days (10 h light/18 °C; 14 h dark/14 °C) (b), or short days  
724 followed by vernalisation (8 h light/4 °C; 16 h dark/4 °C) and shift to long days at day 64 (c). Flowering  
725 time (days of following year) of plants sown on dry soil on September 20<sup>th</sup> and grown without  
726 artificial watering in the botanical garden (d). Letters indicate significant differences at a level  $p < 0,05$ .

727 **Fig. 5:** Germination frequency of seeds from the 12 different Cologne genotypes and Col-0 controls.  
728 Seeds were germinated on filter paper at 20 °C in petri dishes after 3-4 months of afterripening to test  
729 for primary dormancy (a) or incubated at 35 °C in the dark for 4 days before incubation at 20 °C to  
730 observe heat induced secondary dormancy (b) (4 replicates per genotype). Germination frequency of  
731 seeds counted on October 5<sup>th</sup>, that were sown on dry soil in a common garden experiment without  
732 artificial watering on August 23<sup>rd</sup> (c) or September 20<sup>th</sup> (d) demonstrating different reaction to heat  
733 induced secondary dormancy under natural field conditions. Letters indicate significant differences at  
734 a level  $p < 0,05$ .

735 **Fig. 6:** Opposite variation of phenology in urban *A. thaliana* genotypes, as observed within urban  
736 habitat patches in the City of Cologne (in-situ; blue), and in a common-garden experiment in the  
737 same city (ex-situ; red). Populations are sorted by the disturbance frequency in urban habitat  
738 patches (average DF values). The timing of flowering (bolting) in-situ increases with disturbance  
739 frequency, whereas the opposite trend is observable for the timing of flowering in indoor common  
740 garden conditions (red).

741

742

## 743 **Journal of Ecology Supporting Information**

### 744 **Environmental filtering allows local adaptation of life-history traits of *Arabidopsis thaliana* urban** 745 **populations**

746 **Authors:** Gregor Schmitz, Anke S. K. Frank, Hannes Dittberner, Andrea Schrader, Karl-Heinz Linne von  
747 Berg, George Coupland, Juliette de Meaux, Anja Linstädter

### 748 **Supplementary information:**

#### 749 **Bioinformatics pipeline and identification of *A. thaliana* population structure in the city of Cologne**

750 Genomic DNA sequence was characterized by RAD-Seq as described by Dittberner et al. (2019) using  
751 10 pools with 20 plants each. The mapping of sequenced reads and the determination of population  
752 structure is described in the following.

753 Reads were trimmed with TRIMMOMATIC and low quality reads were sorted out using FastQC. Reads  
754 were subsequently mapped to the *A. thaliana* reference genome TAIR10 (Berardini et al. 2015).  
755 Minimum coverage for SNP calling was 15. Forty-five individuals with missing data in more than 70%  
756 of loci were removed from the main dataset (see below). Loci with more than 20% missing data were  
757 discarded. The RAD genotype dataset was merged with the 1001 genomes SNP dataset (Alonso-  
758 Blanco et al. 2016) using *bcftools* (Li 2011) and filtered to include only loci genotyped in the RADseq  
759 dataset. Genetic distances between pairs of individuals were calculated using a custom python script.  
760 A heatmap of genetic distances was created using the *heatmap3* package (Zhao et al., 2015). Genetic  
761 distance (Cavalli-Sforza & Edwards 1967) among populations was calculated using the *hierfstat*  
762 package (Goudet & Jombart 2015). For each environmental factor, pairwise Euclidean distance  
763 among populations was calculated. Correlation between environmental and genetic distance as well  
764 as between geographic and genetic distance was tested using a Mantel test with 999 permutations.

765 To relate Cologne genotypes to the larger collection of accessions of the 1001-genome project, we  
766 included accessions from Germany and from countries close to Germany in western, northern or  
767 southern direction (France, Spain, Switzerland, Netherlands, United Kingdom and Italy) with at most  
768 40 accessions per country. Accessions from countries with more than 40 accessions in the dataset  
769 were randomly subsampled and relict accessions (Alonso-Blanco et al. 2016) were removed. Cologne  
770 genotypes from both sample sets ('populations from the eight habitat patches' and from 'scattered  
771 sites') were subsampled to remove genetically identical individuals, resulting in a set of 51  
772 genotypes. In order to visualize similarity between plant genomes, a principal component analysis  
773 was conducted using the *vcfR* package (Knaus & Grünwald 2017) and the *ade4* package  
774 (Kollmann & Fischer 2003) with missing variants scaled to the mean.

775 To assign genotypes to the 45 individuals with low coverage, we called SNPs again allowing for  
776 minimum coverage of 2. We removed all SNPs with more than 50% missing data. We used the  
777 software *SNPmatch* (Pisupati et al. 2017) to create a database of the high quality SNP dataset and  
778 find the closest match to the database for each of the 45 low-coverage individuals. If the 3 best  
779 matches were the same genotype and identity was over 97%, we assigned that genotype to the  
780 individual.

### 781 **References for supplementary methods**

782

783

- 784 Alonso-Blanco C., J. Andrade, C. Becker, F. Bemm, J. Bergelson, et al., 2016 1,135 Genomes Reveal  
785 the Global Pattern of Polymorphism in *Arabidopsis thaliana*. *Cell* 166: 481–491.
- 786 Berardini T. Z., L. Reiser, D. Li, Y. Mezheritsky, R. Muller, et al., 2015 The arabidopsis information  
787 resource: Making and mining the “gold standard” annotated reference plant genome. *genesis* 53:  
788 474–485.
- 789 Cavalli-Sforza L. L., and A. W. F. Edwards, 1967 Phylogenetic analysis. Models and estimation  
790 procedures. *Am J Hum Genet* 19: 233–257.
- 791 Dittberner, H., Becker, C., Jiao, W.-B., Schneeberger, K., Hölzel, N., Tellier, A., & Meaux, J. de. (2019).  
792 Strengths and potential pitfalls of hay transfer for ecological restoration revealed by RAD-seq analysis  
793 in floodplain *Arabis* species. *Molecular Ecology*, 28(17), 3887–3901.
- 794 Goudet J., and T. Jombart, 2015 hierfstat: Estimation and Tests of Hierarchical F-Statistics.
- 795 Knaus B. J., and N. J. Grünwald, 2017 vcfr: a package to manipulate and visualize variant call format  
796 data in R. *Molecular Ecology Resources* 17: 44–53.
- 797 Kollmann J., and A. Fischer, 2003 Vegetation as indicator for habitat quality. *Basic and Applied*  
798 *Ecology* 4: 489–491.
- 799 Li H., 2011 A statistical framework for SNP calling, mutation discovery, association mapping and  
800 population genetical parameter estimation from sequencing data. *Bioinformatics* 27: 2987–2993.
- 801 Pisupati R., I. Reichardt, Ü. Seren, P. Korte, V. Nizhynska, et al., 2017 Verification of *Arabidopsis* stock  
802 collections using SNPmatch, a tool for genotyping high-plexed samples. *Scientific Data* 4: 170184.
- 803



804 **SUPPORTING TABLE LEGENDS**

805 **Table S1:** GPS coordinates of the sites monitored in the study

806 **Table S2:** Plant community present in the sites of the study and associated Ellenberg and disturbance  
807 indicator values (EIV and DIV, respectively).

808

809 **Table S3:** Summary of RAD-sequencing data. First generation progeny of plants described below in  
810 Table S4 were used for DNA isolation. Links to sequencing data are given for plants with high  
811 sequencing coverage. Assignments of individual plants to genotypes is described in material and  
812 methods.

813 **Table S4:** Phenology data of individual plants from the 8 monitored sites of Table S1. Each plant has a  
814 unique identifier containing the name of the sub-site of sampling.

815 **Table S5:** Flowering time data for individual plants grown in controlled conditions (indoor common  
816 garden). Data show the days when the first flower has open petals and is calculated from the day of  
817 sowing. NA- plants were lost during the experiment. Plants that did not flower within 105 days were  
818 assigned ">105".

819 **Table S6:** Germination in controlled conditions (indoor common garden). Data indicate the fraction  
820 of germinated seeds after 10 d incubation at 20°C. Pre-treatments are described in material and  
821 methods.

822 **Table S7:** a- Summary of common garden experiments for plants sown in August, September and  
823 November and b- in February (see methods). Germination was recorded at different time points after  
824 sowing. For the February cohort, density was reduced to 1 plant per pot, for the other cohorts all  
825 plants were left to grow. For these experiments, flowering time is the average of flowering time of  
826 surviving plants.

827

828

829

### 830 SUPPORTING FIGURE LEGENDS

831 **Figure S1:** Characteristics of eight urban *Arabidopsis thaliana* populations and their habitat  
832 conditions in the city of Cologne, with (a) differences between habitat patches based on plant  
833 species' Ellenberg indicator for humidity (F), (b) light intensity (L) index, and (c) Herb layer structure-  
834 based disturbance index. Letters indicate significant differences at  $p < 0.05$ .

835 **Figure S2:** Significant correlations between Ellenberg Indicator Values (EIVs) and Disturbance  
836 Indicator Values (DIVs) for the eight *A. thaliana* habitat patches in the City of Cologne. EIVs are light  
837 regime (L), temperature (T), continentality of climate (K), soil moisture (F), soil reaction (R), and  
838 nutrient availability (N); DIVs are Disturbance frequency index (DF), Disturbance strength index (DS),  
839 and Herb layer structure-based disturbance index (DV)

840 **Figure S3:** Development of phenological stages over time observed at the eight Cologne populations  
841 shown as percentage of plants reaching the stage of bolting, onset of flowering and onset of fruiting  
842 .

843 **Figure S4:** Correlation of average phenological stages and growth phenotypes between urban  
844 populations (only significant correlations are shown).

845 **Figure S5:** Pairwise genetic distance of genotypes sampled in the eight urban habitat patches (BER,  
846 BIS, GHU, HLU, KAD, MIL, SGY, RKO) and from additional scattered sites of the study area.

847 Genetic distance between genotypes, as measured by the average number of pairwise nucleotide  
848 differences  $p$ , ranged from 0.0017 to 0.0034 with a mean of 0.003. Genetic similarity allowed  
849 clustering genotypes into three groups: Group 1 comprised RKO and BER, group 2 KAS-1, KAS-2, and  
850 BIS-2, group 3 consisted of HLU-1, HLU-2, and SGY. Populations displayed no signal of isolation by  
851 geographic distance (Mantel test  $p > 0.05$ ) or isolation by environmental distance (Mantel test  $p > 0.05$   
852 for all environmental factors; see below). In the additional populations, 44 individual genotypes were  
853 found among the 65 sequenced, and no genotype was found at more than one site. Five accessions  
854 (RUS16, RUS17, ROD8, RUS23, RUW1) deviated from the rest and co-localized with Swedish  
855 accessions. Interestingly, we also found four individuals originating from a single site (ROD-1, ROD-2,  
856 ROD-3, ROD-4), which were virtually identical (1 SNP) to the accession TueWa1-2 from Tübingen  
857 (Germany), which was described in the Arabidopsis 1001 Genomes Project. This lineage might result  
858 from long-range migration.

859 **Figure S6:** Germination frequency of seeds from the 12 different Cologne genotypes and Col-0  
860 controls. Seeds were germinated on filter paper at 20 °C in petri dishes following stratification for 7d  
861 at 4 °C and demonstrating that seeds are viable (a) or an incubation at -21 °C in the dark (b). (4  
862 replicates per genotype).

863 **Figure S7:** Germination frequency of seeds from the 12 different Cologne genotypes and Col-0  
864 controls germinated in common garden conditions. Seeds were sown on dry soil on August 23rd (a,  
865 b), September 20th (c, d), November 8th (e), or February 6th (f). Germination was scored on October  
866 5th (a, c), October 31st (b, d) for the August and September sowing. Note that at the second time  
867 point, more than 50% of seeds germinated, but GHU, SGY, KAS1, and RKO still had approximately  
868 20% lower germination rates compared to the other genotypes. Germination was scored on  
869 December 13th (e), and April 5th (f) for the November and February cohorts, respectively.  
870 Differences between a) and c) can be explained by high temperature induced secondary dormancy.

871 **Figure S8:** Flowering time (days of year) of plants from the 12 different Cologne genotypes and Col-0  
872 controls grown in common garden conditions. Seeds were sown on dry soil on February 6th (a),  
873 August 23rd (b), September 20th (c), or November 8th (d). Letters indicate significant differences at a  
874 level  $p < 0,05$ .

875 **Figure S9:** Correlation among averages for flowering time phenotypes measured in controlled  
876 laboratory conditions and in common garden experiments. Flowering times between the 4 planting  
877 cohorts show little correlation

878 **Figure S10:** Common garden experiments - number of siliques of single plants sown in February (a),  
879 or number of siliques per pot with 8 seeds sown in August (b), September (c), or November (d).  
880 Letters indicate significant differences at a level  $p < 0,05$ . Scales differ for the plots.

881 **Figure S11:** Correlation of averages of phenotypes of plants in controlled lab conditions, outdoor  
882 common garden experiments (cohorts) and averages of Ellenberg and disturbance indicator values  
883 of the sites of their origin (L- Light, T- Temperature, K- Continentality, R- pH, N- nutrients, DF-  
884 disturbance frequency, DS- disturbance severity, DV- structure-based disturbance index).  
885 Germination rates were monitored at several time points after sowing. Flowering time was scored in  
886 controlled growth chamber under long days, short days, and in a sequence combining short days,  
887 vernalization and then long days (vernalization conditions). Germination was scored in controlled  
888 conditions on untreated 2-month-old seeds and after stratification. Secondary dormancy was  
889 determined by scoring germination in stratified seeds exposed to either freezing conditions or heat  
890 (see methods for details). Fertility was measured in all four outdoor common garden cohorts, but not  
891 in growth chambers.

892 **Figure S12:** Correlation of averages of phenotypes of plants in their original sites, in controlled lab  
893 conditions and in common garden experiments. Germination rates were monitored at several time  
894 points after sowing. Flowering time was scored in controlled growth chamber under long days, short  
895 days, and in a sequence combining short days, vernalization and then long days (vernalization  
896 conditions). Germination was scored in controlled conditions on untreated 2-month-old seeds and  
897 after stratification. Secondary dormancy was determined by scoring germination in stratified seeds  
898 exposed to either freezing conditions or heat (see methods for details). Fertility was measured in all  
899 four outdoor common garden cohorts, but not in growth chambers.

900

901

902

903

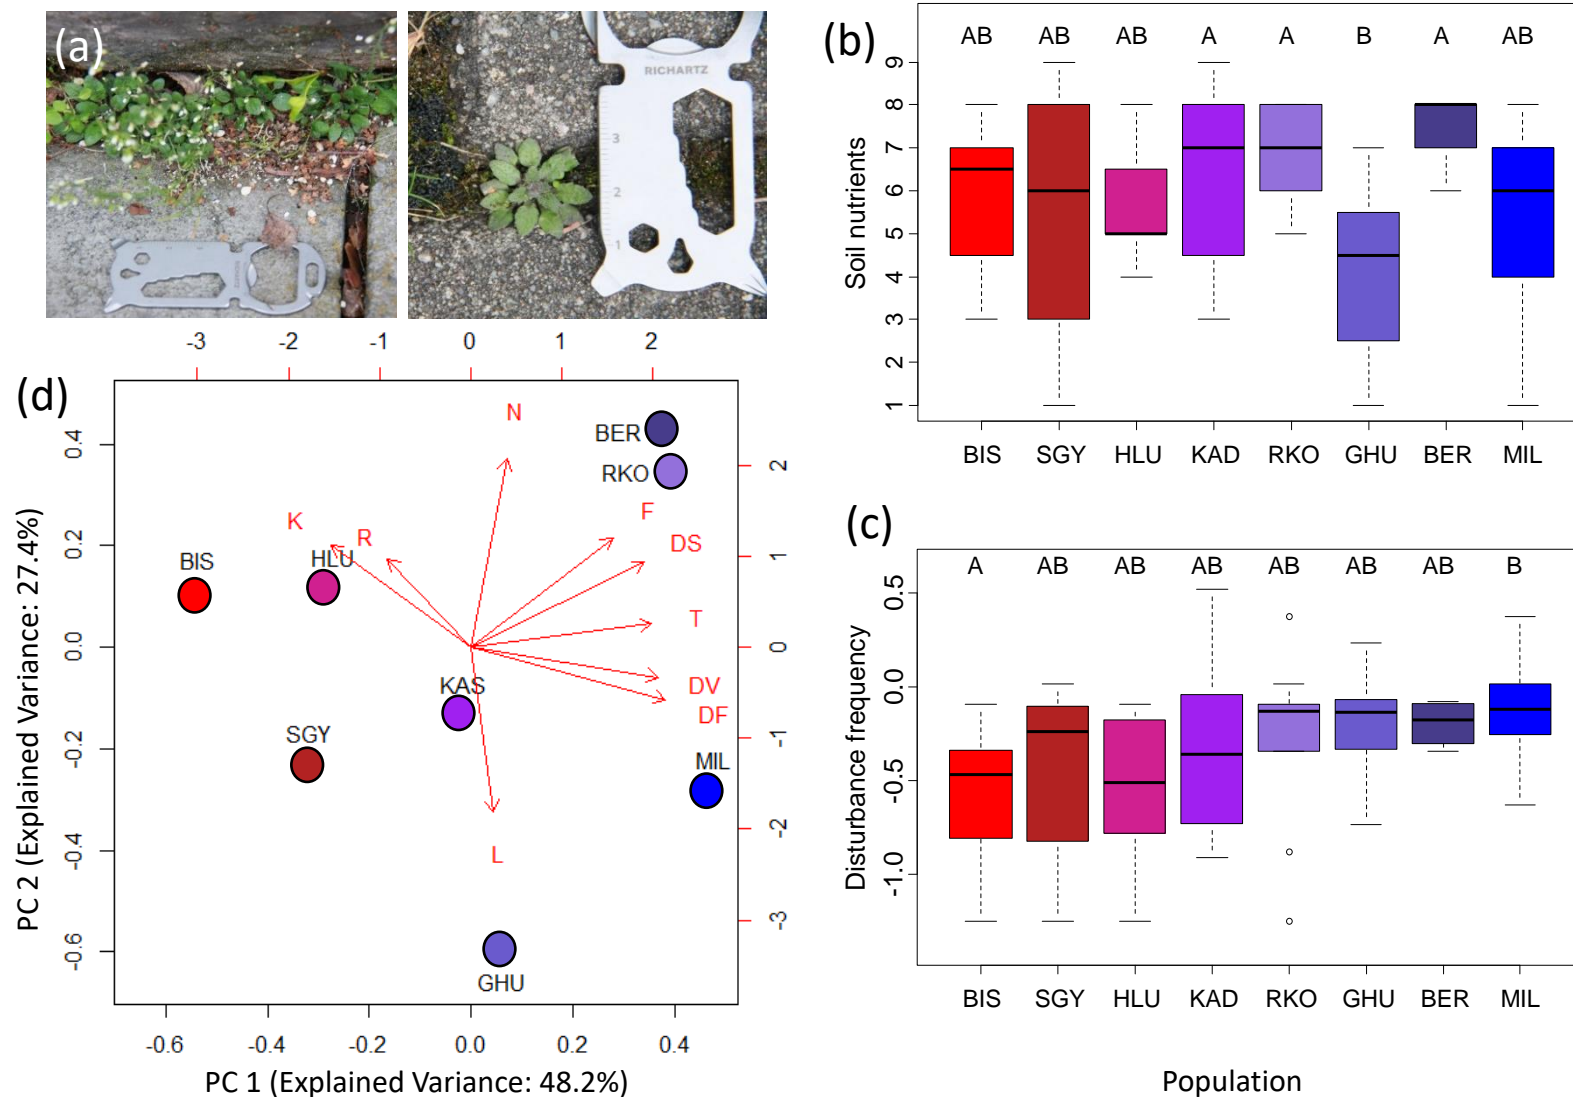

**Fig. 1:** Characteristics of eight urban *Arabidopsis thaliana* populations and their habitat conditions in the city of Cologne, with (a) differences in size and phenological stage between *A. thaliana* from two adjacent habitats (both photographs from 2017-04-03); (b) differences between habitat patches based on plant species' Ellenberg indicator values for soil nutrients and (c) the same based on plant species' Herben indicator for disturbance frequency. Letters indicate significant differences at  $p < 0.05$ . (d) Similarity of habitat patches based on a PCA with plant communities' average indicator values for abiotic environmental conditions and disturbances. For indicator names, see Materials and Methods.

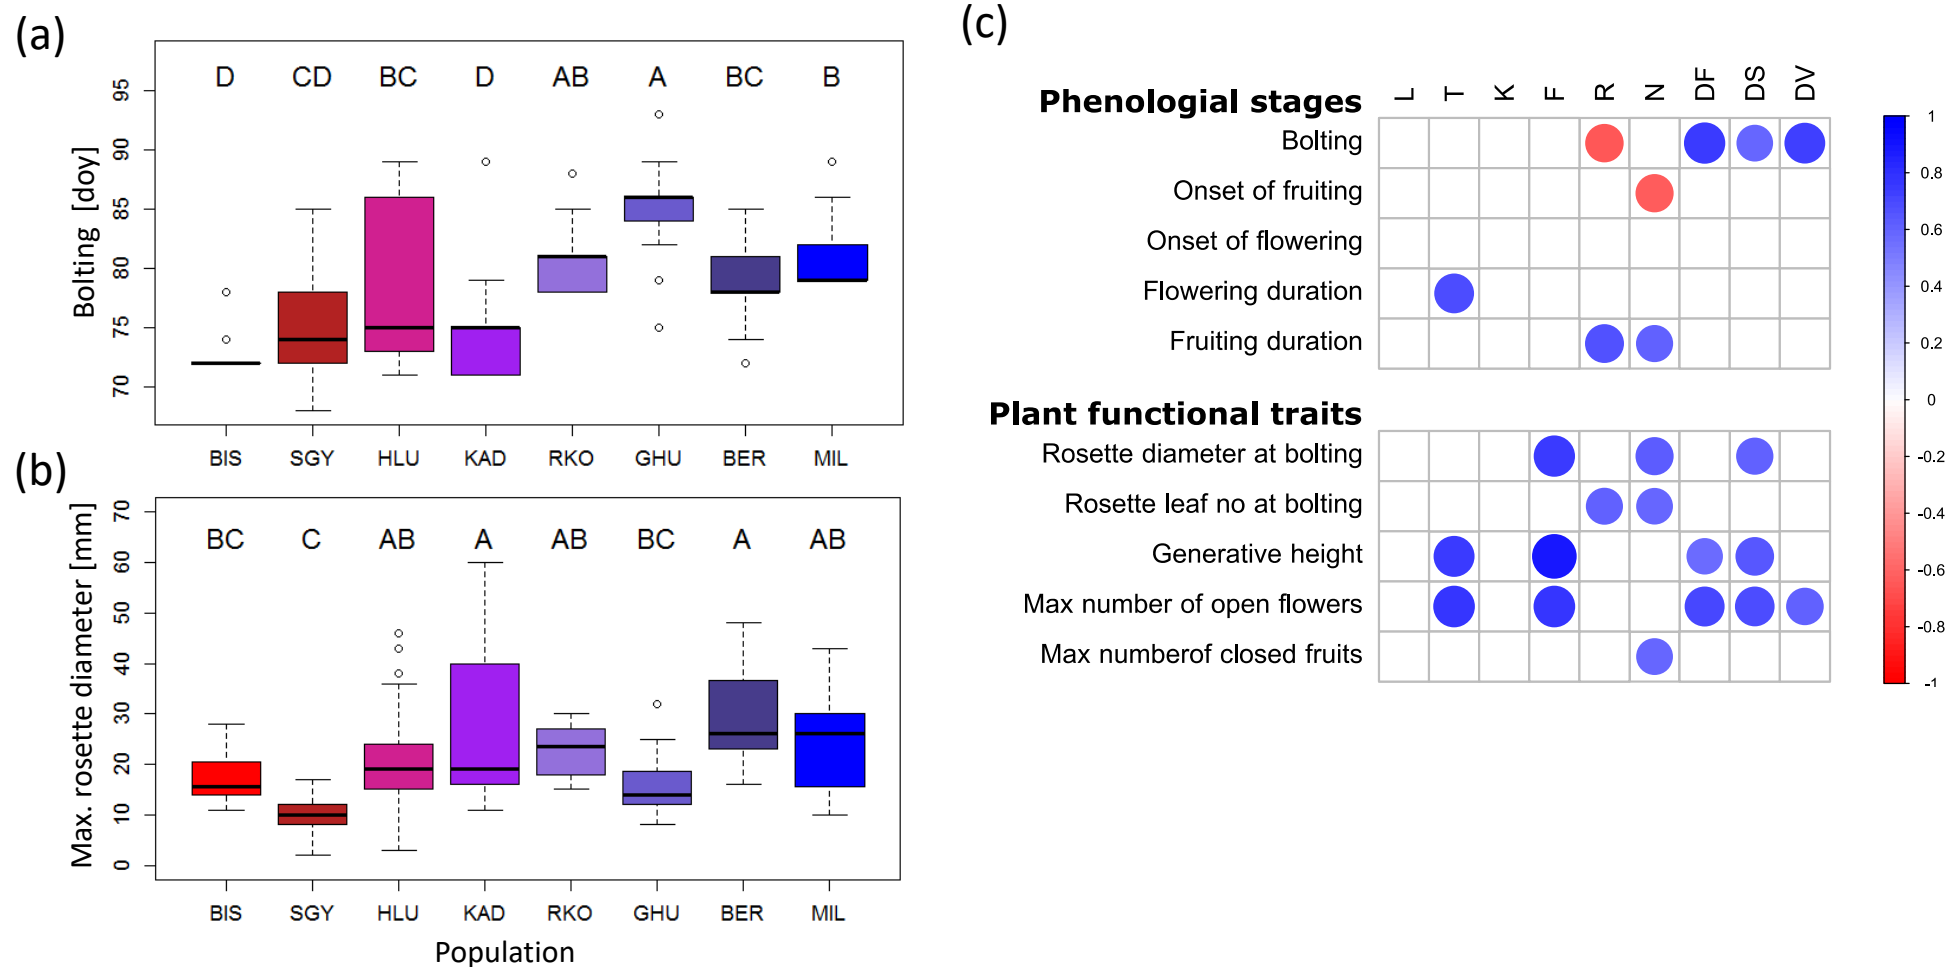

**Fig. 2:** Phenological stages and plant functional traits of the eight urban *A. thaliana* populations measured in-situ, with a) differences in bolting ( $F_{7,149}=17.81$ ,  $p<2e^{-16}$ ); b) differences in maximum rosette diameter ( $F_{7,163}=10.92$ ,  $p=2.85e^{-11}$ ). Letters indicate significant differences at  $p<0.05$ . c) correlations of populations' average phenological stages and functional traits with abiotic habitat conditions (L, T, K, F, R, N) and disturbance regimes (DF, DS, DV).

(a)

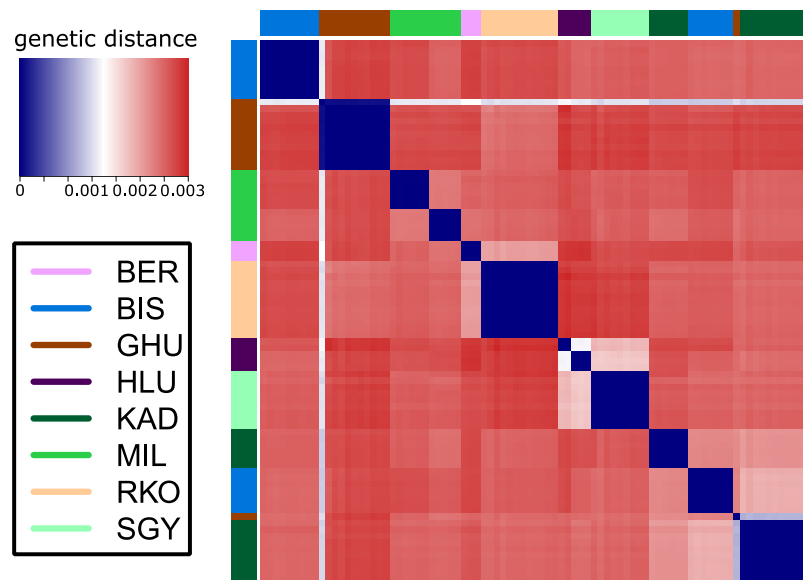

**Fig. 3:** a) Analysis of genetic distance between progeny of 85 individual plants from 8 sampling sites in Cologne determined by RAD-sequencing. Individual plants are colour coded according to their origin. b) Principal component analysis of genetic differences between Cologne plants from the 8 sampling sites (blue), plants from additional sites of the sampling area (red) and selected lines of the Arabidopsis 1001 genome set (grey). Origin of 1001 genome lines is indicated for countries represented by higher number of accessions (AUT-Austria, CZE-Czech Republic, ESP-Spain, FRA-France, GER-Germany, ITA-Italy, NED-The Netherlands, SUI-Switzerland, SWE-Sweden, UK-United Kingdom). c) Magnification of the yellow marked part of the plot b).

(b)

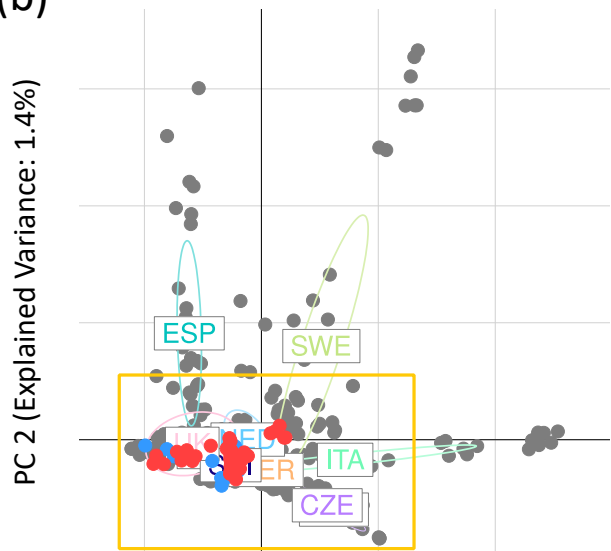

(c)

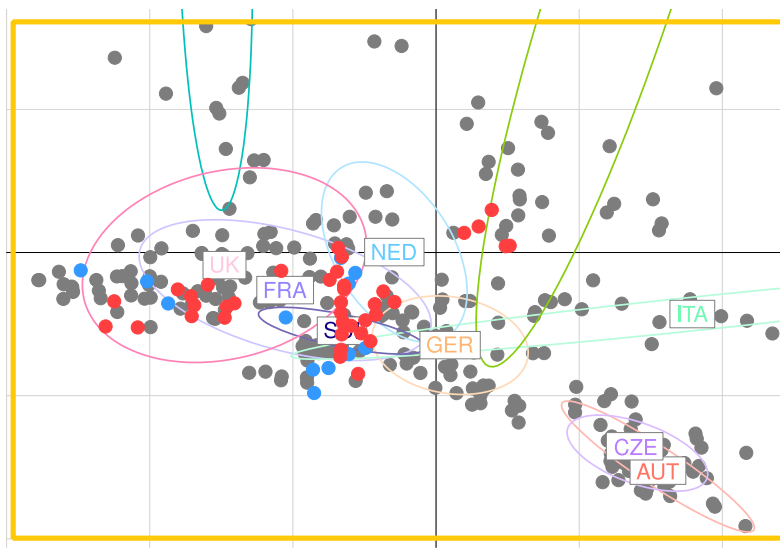

PC 1 (Explained Variance: 1.6%)

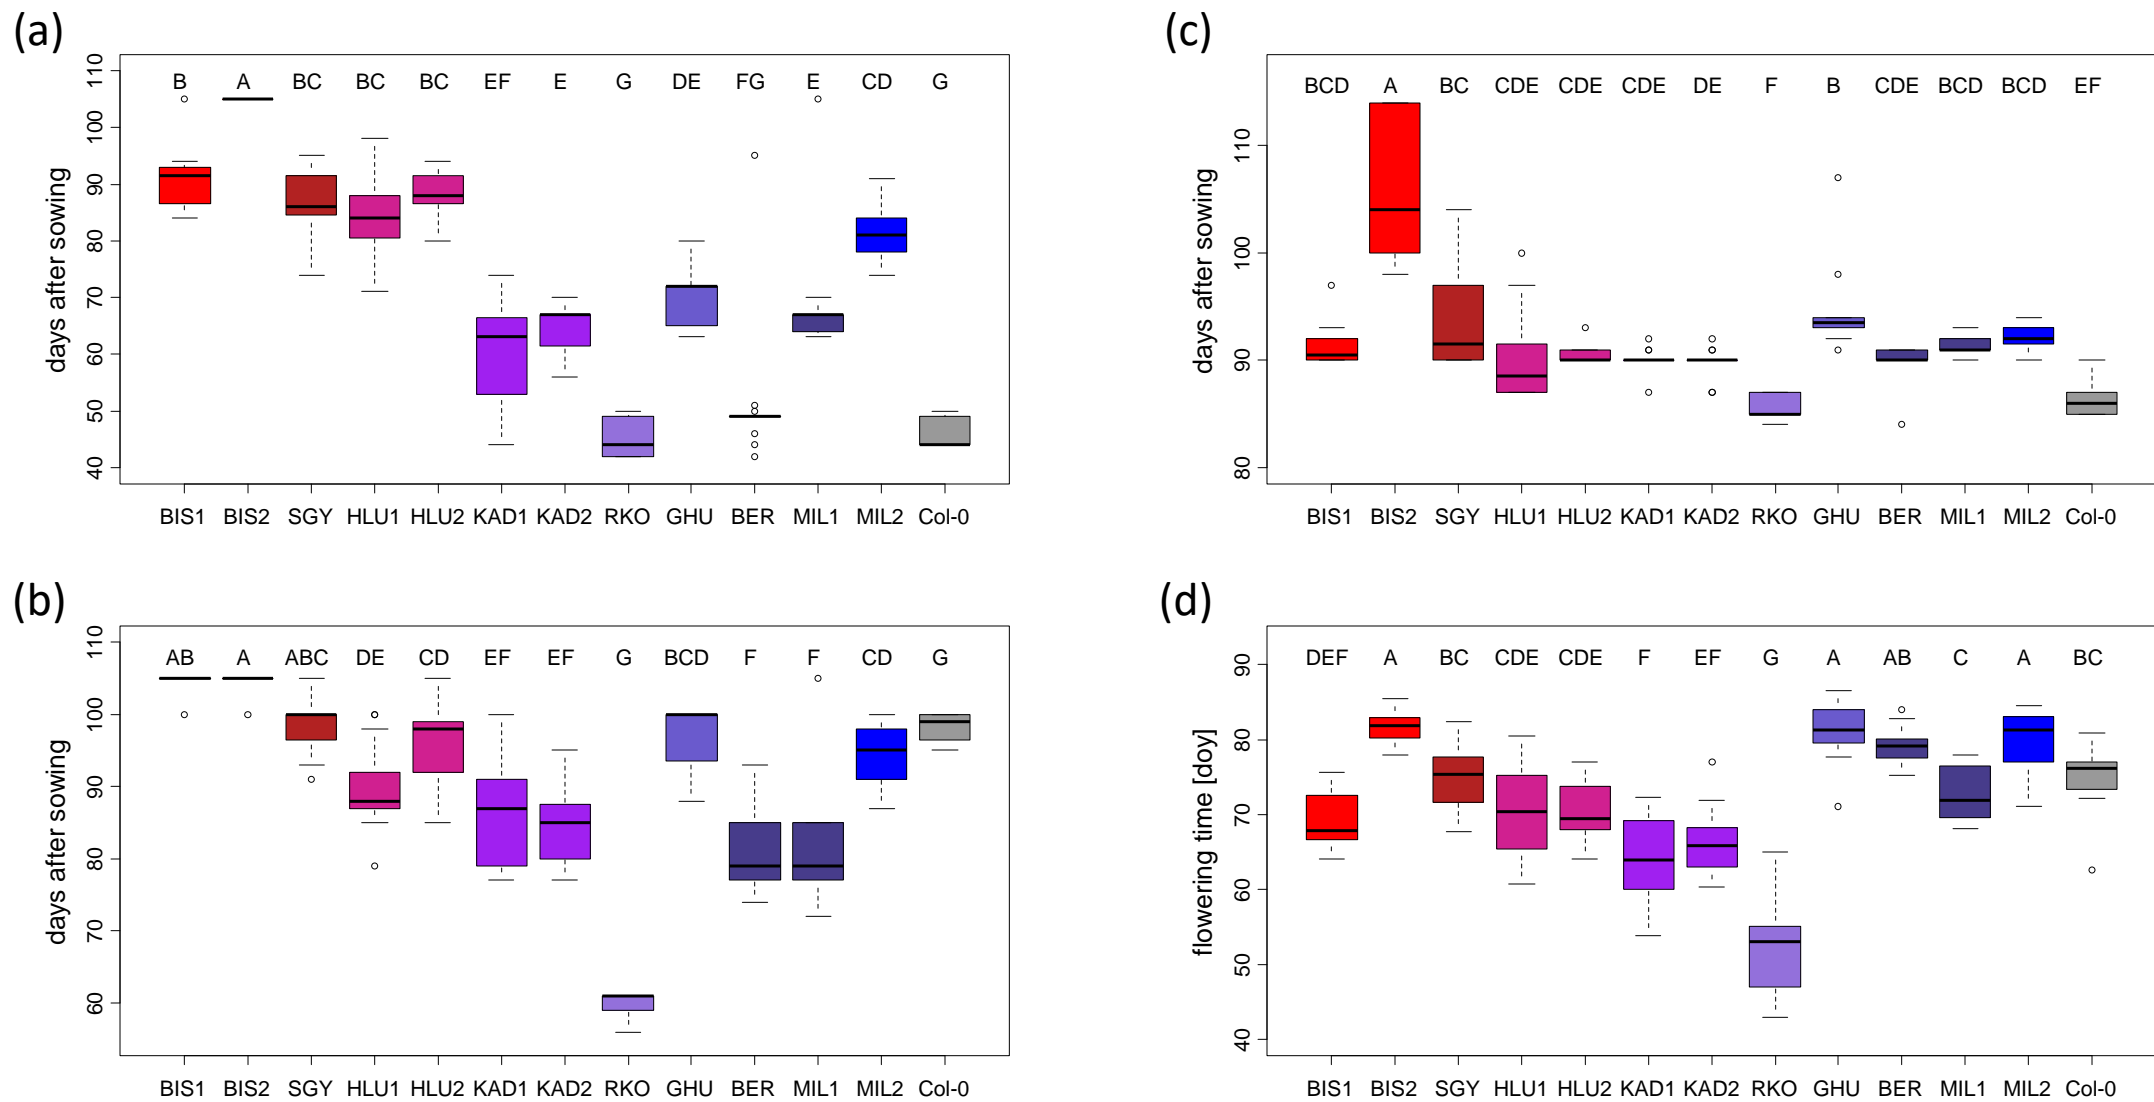

**Fig. 4:** Flowering time (days after sowing) of plants grown in controlled conditions: long days (16 h light/20 °C; 8 h dark/18 °C) (a), short days (10 h light/18 °C; 14 h dark/14 °C) (b), or short days followed by vernalisation (8 h light/4 °C; 16 h dark/4 °C) and shift to long days at day 64 (c). Flowering time (days of following year) of plants sown on dry soil on September 20<sup>th</sup> and grown without artificial watering in the botanical garden (d). Letters indicate significant differences at a level  $p < 0.05$ .



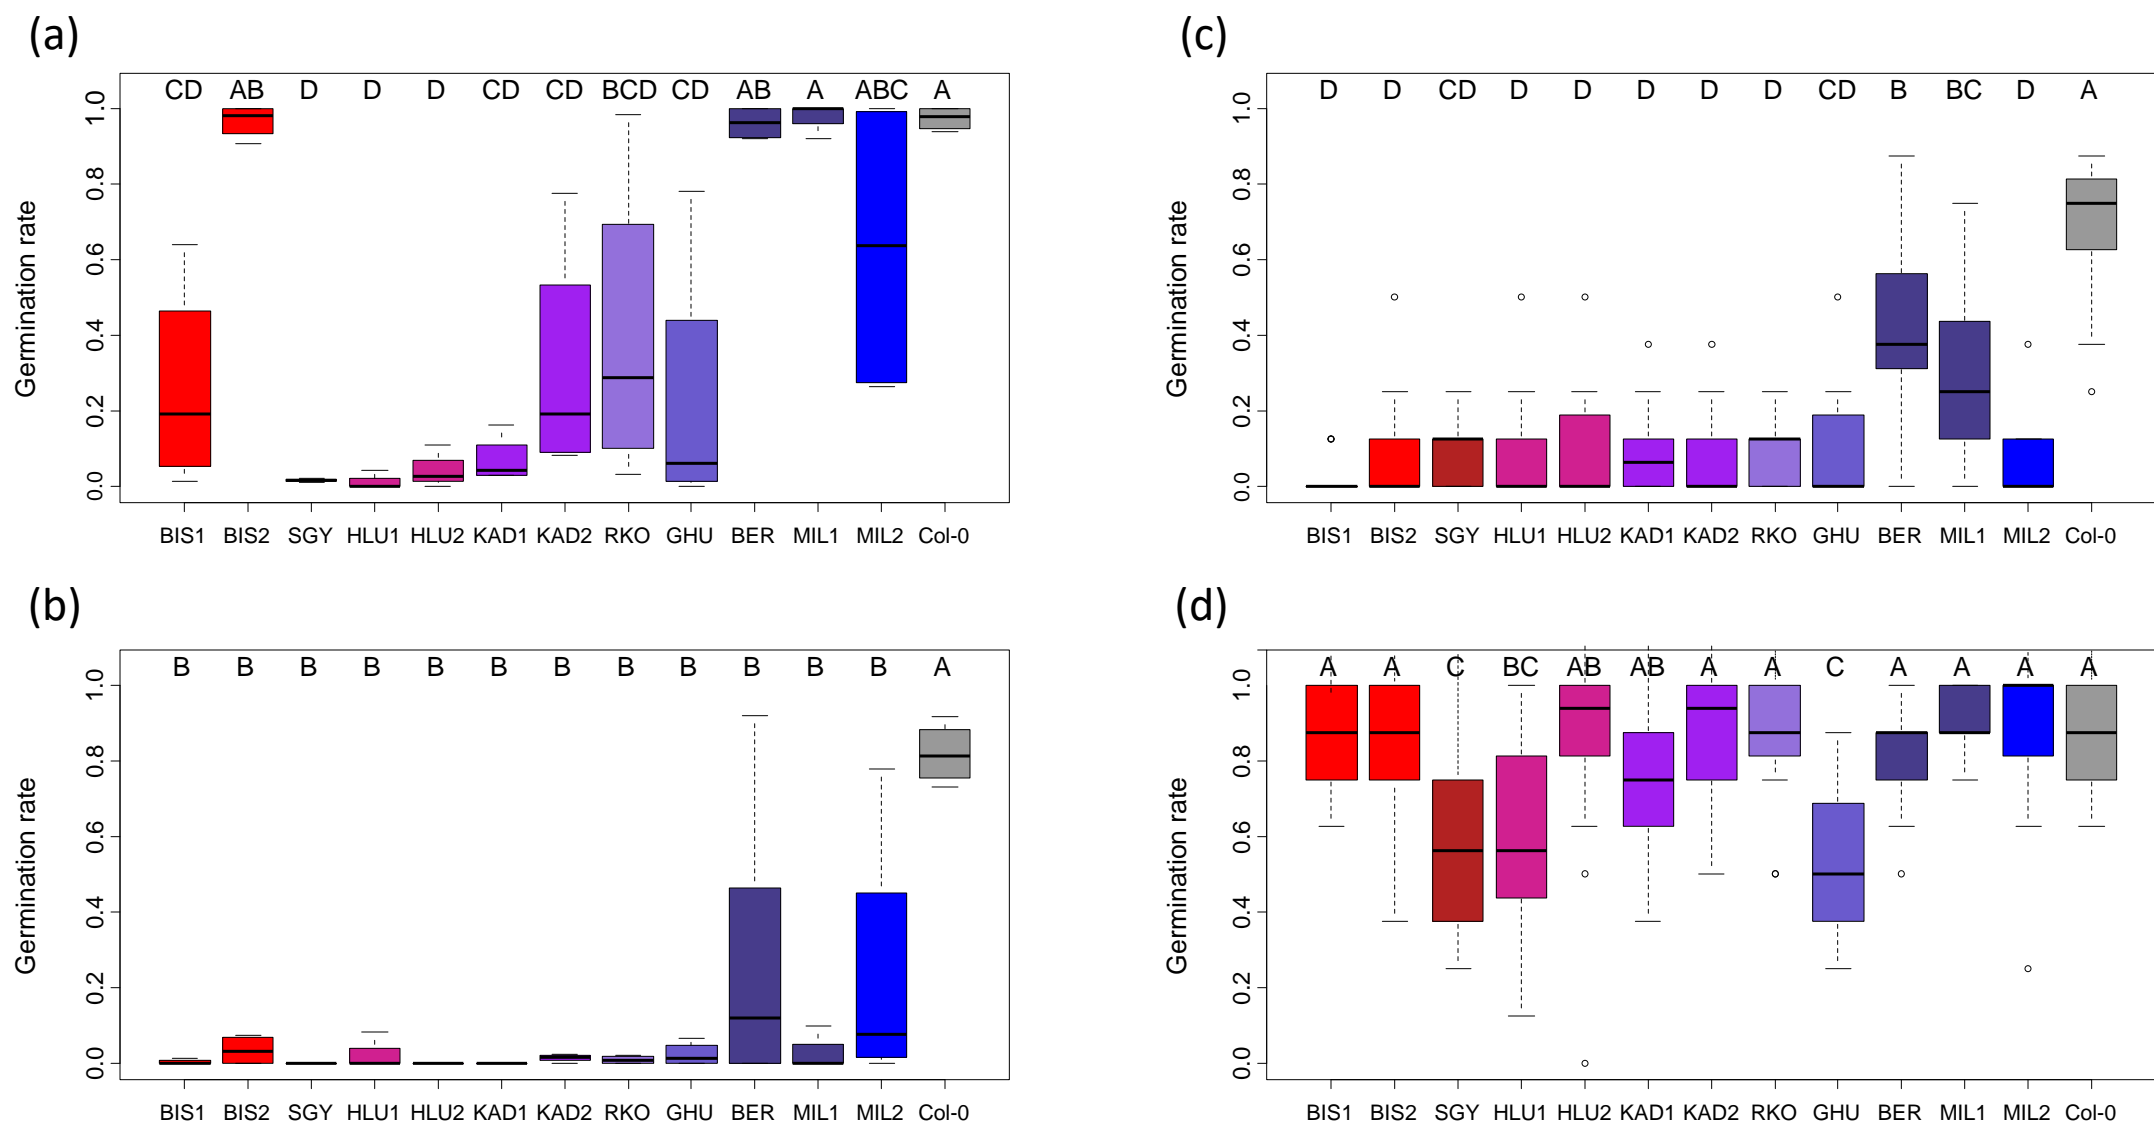

**Fig. 5:** Germination frequency of seeds from the 12 different Cologne genotypes and Col-0 controls. Seeds were germinated on filter paper at 20 °C in petri dishes after 3-4 months of afterripening to test for primary dormancy (a) or incubated at 35 °C in the dark for 4 days before incubation at 20 °C to observe heat induced secondary dormancy (b) (4 replicates per genotype). Germination frequency of seeds counted on October 5<sup>th</sup>, that were sown on dry soil in a common garden experiment without artificial watering on August 23<sup>rd</sup> (c) or September 20<sup>th</sup> (d) demonstrating different reaction to heat induced secondary dormancy under natural field conditions. Letters indicate significant differences at a level  $p < 0,05$ .

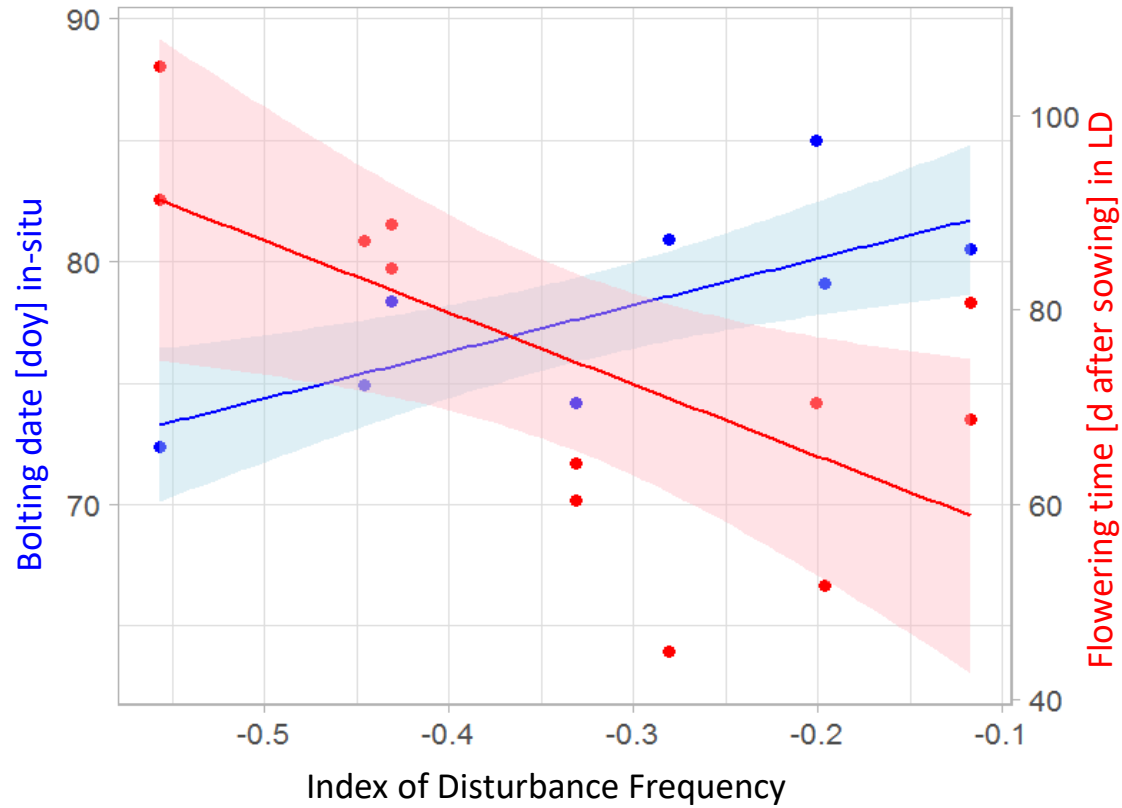

**Fig. 6:** Opposite variation of phenology in urban *A. thaliana* genotypes, as observed within urban habitat patches in the City of Cologne (in-situ; blue), and in a common-garden experiment in the same city (ex-situ; red). Populations are sorted by the disturbance frequency in urban habitat patches (average DF values). The timing of flowering (bolting) in-situ increases with disturbance frequency, whereas the opposite trend is observable for the timing of flowering in common garden conditions (red). Sowing in the latter was done at the time of natural germination.
